1 **Virulence gene profiles and phylogeny of Shiga toxin-positive *Escherichia coli* strains**  
2 **isolated from FDA regulated foods during 2010-2017**

3

4 Narjol Gonzalez-Escalona<sup>1,\*</sup>, and Julie Ann Kase<sup>1</sup>

5

6 <sup>1</sup>Center for Food Safety and Applied Nutrition, Food and Drug Administration, College Park, MD,

7 USA

8

9 **Key words:** Shiga toxin-producing *Escherichia coli*, Whole genome sequencing, virulence  
10 genes, phylogeny, foods

11

12

13

14 **Running title:** Whole genome sequencing of STECs FDA regulated foods

15

16

17

18

19

20

21

22 \*Corresponding author. Mailing address: FDA, CFSAN, 5100 Paint Branch Parkway HFS-712,

23 College Park, MD 20740. Phone: (240) 436-1937. Fax: (301) 436-2644. E-mail: [narjol.gonzalez-](mailto:narjol.gonzalez-escalona@fda.hhs.gov)

24 [escalona@fda.hhs.gov](mailto:escalona@fda.hhs.gov)

25

26 **Abstract:**

27

28 Illnesses caused by Shiga toxin-producing *Escherichia coli* (STECs) can be life threatening,  
29 such as hemolytic uremic syndrome (HUS). The STECs most frequently identified by USDA's  
30 Microbiological Data Program (MDP) carried toxin gene subtypes *stx1a* and/or *stx2a*. Here we  
31 describe the genome sequences of 331 STECs isolated from foods regulated by the FDA 2010-  
32 2017, determining their genomic identity, serotype, sequence type, virulence potential, and  
33 prevalence of antimicrobial resistance. Isolates were selected from the MDP archive, routine  
34 food testing by field labs (ORA), food testing by a contract company, and our laboratory (ORS).  
35 Only 276 (83%) were confirmed as STECs by *in silico* analysis. Foods from which STECs were  
36 recovered included cilantro (6%), spinach (25%), lettuce (11%), and flour (9%). Phylogenetic  
37 analysis using core genome MLST revealed these STEC genomes were highly variable, with  
38 some clustering associated with ST types and serotypes. We detected 95 different sequence  
39 types (ST); several ST were previously associated with HUS: ST21 and ST29 (O26:H11), ST11  
40 (O157:H7), ST33 (O91:H14), ST17 (O103:H2), and ST16 (O111:H-). *in silico* virulome analyses  
41 showed ~ 51% of these strains were potentially pathogenic [besides *stx* gene they also carried  
42 *eae* (25%) or 26% *subA* (26%)]. Virulence gene prevalence was also determined: *stx1* only  
43 (19%) -variants a and c; *stx2* only (66%) – variants a, b, c, d, e, and g; and *stx1/stx2* (15%). Our  
44 data form a new WGS database that can be used to support food safety investigations and  
45 monitor the recurrence/emergence of *E. coli* in foods.

46

47 **Importance**

48

49 Shiga toxin-producing *Escherichia coli* (STECs) are associated with foodborne outbreaks  
50 worldwide; however, surveillance has not previously included genomic analyses for  
51 phylogenetics, prevalence, or potential virulence. We constructed the first genomic database of  
52 isolates from FDA-regulated foods to help monitor the emergence of new pathogenic STECs.  
53 Although only ~30 STECs were isolated per year, 50% of these carried markers associated with  
54 pathogenesis either a combination of *eae* plus *stx*, or *subA* plus *stx*. Moreover, those strains  
55 also carried virulence genes associated with severe illnesses. Here we showed that WGS  
56 enabled comparisons across isolates to establish phylogeny, help in identification of antibiotic  
57 resistance by monitoring the presence of antimicrobial resistance genes, and determined the  
58 presence of known virulence genes that have been linked with illnesses. Future food safety  
59 investigations will benefit from improved source tracking and risk assessments made possible  
60 by these analyses and new WGS database.

61

62

## 63 Introduction

64

65 Shiga toxin-producing *Escherichia coli* (STECs) have the potential to cause infections, from mild  
66 to life threatening outcomes such as hemolytic uremic syndrome (HUS). STECs causing HUS,  
67 hemorrhagic colitis and bloody diarrhea are known as enterohemorrhagic *E. coli* (EHEC).  
68 Among the most common EHECs are O157:H7, O26, O121, O103, O111, and O145. O157:H7  
69 strains are responsible for most foodborne outbreaks in the last two decades (1) while non-  
70 O157 serogroups, O26, O121, O103, O111, and O145 are the second most common cause of  
71 EHEC foodborne infections in the US (2,3) and worldwide (4-7). Each year in the US, O157:H7  
72 cause an approximately 95,000 cases with 2,150 hospitalizations, with non-O157 STECs  
73 responsible for an estimated 170,000 cases (3). These serotypes carry Shiga toxin genes (*stx1*  
74 and/or *stx2*) and there are at least 130 EHEC serotypes that have been recovered from human  
75 patients. The US Department of Agriculture Food Safety and Inspection Services (USDA FSIS)  
76 in 2011, declared O26 and five other non-O157 serogroups, O45, O103, O111, O121, and  
77 O145 as adulterants in ground beef and non-intact beef products, and in mid-2012 began  
78 testing for these pathogens in both domestic and imported beef trimmings (8).

79

80 In order to cause illness, STEC strains need a set of genes that allow them to attach, colonize,  
81 and produce and secrete Shiga toxin protein (9-12). Genes described for attachment and  
82 colonization include *eae* (intimin), other proteins present in the locus of enterocyte effacement  
83 (LEE) locus, T3SS effectors, as well as biofilm production, and other virulence genes that are  
84 usually located in a plasmid (e.g. *ehxA*), referred as the virulence plasmid to differentiate it from  
85 other possible plasmids that can be carried by the same strain as well (9,11,13). Although the  
86 precise role of *ehxA* in STEC pathogenesis remains to be elucidated, several studies  
87 indicate an association of *ehxA* in clinical disease since 1) *ehxA* was found to be produced by  
88 many STEC associated with diarrheal disease and HUS (14-16), and 2) serum samples from

89 HUS patients have been shown to react specifically to *ehxA* (17). Some STECs do not carry  
90 *eae*, however they possess other genes believed to compensated for the lack of *eae* (e.g. *subA*,  
91 *saa* or *sat*) (18,19).

92

93 STECs can be transmitted by various means with food remaining the predominant transmission  
94 route (1). Among the illnesses caused by STECs in FDA regulated food products (FRFDA),  
95 fresh produce has been implicated in several outbreaks, as well as some other atypical  
96 commodities, such as flour (20). Leafy greens and other agricultural food crops are particularly  
97 susceptible to contamination since they are grown in close contact with the ground where  
98 runoff from livestock areas, particularly cattle, contaminated irrigation water, manure used as  
99 fertilizer, and the intrusion of wildlife into growing fields can occur (21). Many of these same  
100 items are consumed raw and possibly with little cleaning. Some noteworthy *E. coli* outbreaks  
101 reported by the Center of Disease and Control (CDC) in the US in the last 10 years are: 2009 -  
102 beef (O157:H7) and prepackaged cookie dough (O157:H7); 2010 cheese (O157:H7), romaine  
103 lettuce (O145) and beef (O157:H7); 2011 - romaine lettuce (O157:H7), Lebanon bologna  
104 (O157:H7), and in-shell hazelnuts (O157:H7); 2012 - spinach and spring mix blend (O157:H7),  
105 unknown source (O145), and raw clover sprouts (O26); 2013 ready-to-eat salads (O157:H7),  
106 and frozen food products (O121); 2014 - raw clover sprouts (O121), and ground beef  
107 (O157:H7); 2015 - rotisserie chicken salad (O157:H7), and Mexican-style restaurant chain  
108 (O26); 2016 - flour (O121 and O26), and alfalfa sprouts (O157); 2017 - leafy greens (O157:H7),  
109 and soy nut butter (O157:H7); in this year, 2018, there has been an outbreak link to romaine  
110 lettuce caused by O157:H7 (<https://www.cdc.gov/ecoli/outbreaks.html>).

111

112 Beyond the noted outbreaks, there have been several reports on STECs found in FRFDA  
113 (22,23). The most comprehensive survey was the USDA Microbiological Data Program (MDP)  
114 that collected domestic and imported fresh fruit and vegetable samples from primarily terminal

115 markets and wholesale distribution centers from 2001-2012  
116 (<https://www.ams.usda.gov/datasets/mdp/mdp-program-data-and-reports>). This program tested  
117 approximately up to 15,000 samples annually, and tested for the presence of *Salmonella*, *E. coli*  
118 O157:H7, and other STECs. STEC were found most frequently from spinach samples (0.5%),  
119 and of the 132 STECs isolated, 9% were found to carry *eae*. The most prevalent Shiga toxin  
120 variants found were *stx1a* (22%) and/or *stx2a* (56%) (23). However, little other information about  
121 the genome content of those strains is publicly available.

122  
123 Whole genome sequencing (WGS) technology is reshaping food safety and food-borne illness  
124 investigations (24). The use of WGS is becoming more useful as the cost of bacterial genome  
125 sequencing decreases every year. WGS cost per bacterial sequence is now comparable to  
126 PFGE. There are many attractive attributes with regards to the use of WGS for analyzing food  
127 samples including the potential to identify all pathogens present in that sample (25). Among  
128 other applications of the use of WGS are: it can help in identifying genes that allow for  
129 resistance/survival or virulence of certain bacterial strains (26-28), can help in establishing  
130 phylogenetic relationships among old strains of STECs isolated from either clinical cases or  
131 environmental samples (7,29,30), and can further help in Identifying matches between  
132 environmental and outbreak strains during outbreaks scenarios (26,30-32). Furthermore, using  
133 WGS can help in identifying matches among bacterial strains isolated from environmental  
134 samples in production facilities and may help locate contamination sources (33). It can also be  
135 extremely helpful in establishing mechanism of evolution among pathogens (34). For example  
136 the 2011 outbreak in Germany linked to fenugreek seeds caused by an *E. coli* strain with a  
137 genomic backbone and virulence traits of entero-aggregative *E. coli* (EAEC) but had acquired a  
138 *stx* phage (*stx2a* gene variant) and caused a more aggressive disease with high HUS rate  
139 cases (35,36). This event highlighted the high plasticity of the *E. coli* genomes and it constitutes  
140 a warning of the possible arise of more of this new “hybrid pathotype” strains.

141 Therefore, we wanted to further characterize and catalog historical strains of STECs isolated  
142 from FRFDA by performing WGS analysis of every STEC strains isolated by the MDP and other  
143 FDA surveillance programs, as well as, some FDA historical isolates. This work establishes is  
144 the first genomic database of FRFDA isolates which in turn, will allow improved surveillance for  
145 both recurrence and the emergence of new strains that might be impacting our food supply. A  
146 total of 296 presumptive STECs were isolated during 2010-2017, and 35 additional STECs were  
147 historical isolates from our collection. The 331 presumptive STEC strains were analyzed for  
148 virulence genes [encompassing all *E. coli* virulent types - STEC, entero-pathogenic *E. coli*  
149 (EPEC), entero-toxigenic *E. coli* (ETEC), entero-invasive *E. coli* (EIEC), and EAEC], *in silico*  
150 MLST, and antibiotic resistance genes. Finally, their phylogenetic relationships and diversity  
151 were determined by whole genome phylogeny analysis using an allele-based whole genome  
152 multilocus sequence analysis (MLST) or core genome MLST analysis (cgMLST).

153

154 **Materials and Methods**

155

156 **Bacterial strains and media.** *E. coli* (n = 331) presumptive Shiga toxin-positive strains used in  
157 this study are listed in supplementary table 1 (Table S1). Each strain was assigned a CFSAN  
158 number for future tracking. The FRFDA strains were isolated by us (n = 196), FDA Office of  
159 Regulatory Affairs (ORA) laboratories (n = 74), and a contracting lab (n = 63) during 2012-2017  
160 in the US.

161

162 **DNA preparation.** Genomic DNA from each strain was isolated from overnight cultures using  
163 the DNeasy Blood and Tissue Kit (QIAGEN, Valencia, CA), following the manufacturer's  
164 instructions. The resultant DNA extract was stored at -20°C until used as a template for whole  
165 genome sequencing. The concentration was determined using a Qubit double-stranded DNA  
166 HS assay kit and a Qubit 2.0 fluorometer (Thermo Fisher Scientific, Waltham, MA), according to  
167 manufacturer's instructions.

168

169 **Whole genome sequencing, contig assembly and annotation.** The genomes of the strains  
170 were sequenced, using an Illumina MiSeq sequencer (Illumina, San Diego, CA), with the  
171 2x250 bp pair-end chemistry according to manufacturer's instructions, at approximately 80X  
172 average coverage. The genome libraries were constructed using the Nextera XT DNA sample  
173 prep kit (Illumina). Genomic sequence contigs were *de novo* assembled using default settings  
174 within CLC Genomics Workbench v9.5.2 (QIAGEN) with a minimum contig size threshold of  
175 500 bp in length.

176

177 ***in silico* serotyping.** The serotype of each strain analyzed in this study was confirmed using  
178 the genes deposited in the Center for Genomic Epidemiology  
179 (<http://www.genomicepidemiology.org>) for *E. coli* as part of their web-based serotyping tool



180 (SerotypeFinder 1.1 - <https://cge.cbs.dtu.dk/services/SerotypeFinder>) (37,37,38). We used  
181 Ridom for performing batch screening of the genomes analyzed. Briefly, all the genes were  
182 divided into O-type (*wzx* and *wzy*) and H-type (*fliC*) genes in FASTA format (ex. All *wzx* alleles  
183 were in a single FASTA file), and used as task template. For the virulence screening, a project  
184 was created using all three task templates and each whole genome sequence was screened for  
185 the presence of each gene type (O-type or H-type gene). Results were similar to  
186 SerotypeFinder, and as done for the virulence genes previously, the data was now in a  
187 database and new alleles (if found) could be added to the task templates.

188

189 ***in silico* MLST phylogenetic analysis.** The initial analysis and identification of the strains  
190 were performed using an *in silico* *E. coli* MLST approach, based on the information available  
191 at the *E. coli* MLST website (<http://mlst.warwick.ac.uk/mlst/dbs/Ecoli>) and using Ridom  
192 SeqSphere+ software v2.4.0 (Ridom; Münster, Germany) (<http://www.ridom.com/seqsphere>).  
193 Seven housekeeping genes (*dnaE*, *gyrB*, *recA*, *dtdS*, *pntA*, *pyrC*, and *tnaA*), described  
194 previously for *E. coli* (39), were used for MLST analysis. The same *E. coli* MLST database was  
195 also used to assign numbers for alleles and STs.

196

197 ***in silico* determination of virulence genes.** Virulence genes were determined using the genes  
198 deposited in the Center for Genomic Epidemiology (<http://www.genomicepidemiology.org>) for *E.*  
199 *coli* as part of their VirulenceFinder 1.5 web-based tool  
200 (<https://cge.cbs.dtu.dk/services/VirulenceFinder>) (38), except that we used Ridom for performing  
201 batch screening of the genomes analyzed. Briefly, all the genes were divided into classes or  
202 groups by homology in FASTA format (e.g. All *astA* alleles were in a single FASTA file), and  
203 used as a task template. Afterwards a project was created using all these task templates, and  
204 each WGS was screened for the presence of each gene class (virulence gene). We tested for  
205 95 virulence genes previously reported here (27). These 95 virulence genes include different *E.*

206 *coli* pathotypes (ETEC, STEC, EAEC, and EPEC) in order to detect any possible *E. coli* hybrid if  
207 present as observed for the O104:H4 Germany. The *stx* gene variants analyzed are available at  
208 <https://cge.cbs.dtu.dk/services/VirulenceFinder>. The result was very similar to the one displayed  
209 at VirulenceFinder, except that the data are now in a database and new alleles (if found) could  
210 be added to the task templates.

211  
212 ***in silico* antimicrobial resistance genes identification.** Antimicrobial resistance genes  
213 present in sequenced genomes as well as in those retrieved from GenBank (Table 2) were  
214 identified by using the genes deposited in the Center for Genomic Epidemiology  
215 (<http://www.genomicepidemiology.org>) as part of their Resfinder 2.1 web-based tool  
216 (<https://cge.cbs.dtu.dk/services/ResFinder>) (40), except that we used Ridom for performing  
217 batch screening of the genomes analyzed. Briefly, all the genes were divided into classes or  
218 groups by homology in fasta format (e.g. All *bla*<sup>TM</sup> alleles were located in a single fasta file),  
219 and used as task template. Later a project was created using all these task templates, and each  
220 WGS was screened for the presence of each gene class (antimicrobial resistance gene). The  
221 result was very similar to the one displayed at ResFinder, except that the data are now in a  
222 database and new alleles (if found) could be added to the task templates.

223  
224 **Phylogenetic relationship of the strains by cgMLST analysis.** The phylogenetic relationship  
225 of the strains was assessed by a core genome multilocus sequence typing (cgMLST) analysis  
226 using Ridom SeqSphere+ software v2.4.0. The genome of O26:H11 strain 11368  
227 (NC\_013361.1) was used as a reference. After eliminating loci that were missing from the  
228 genome of any strain used in our analyses, we performed a cgMLST analysis. These remaining  
229 loci were considered the core genome shared by the analyzed strains. We used Nei's DNA  
230 distance method (41) for calculating the matrix of genetic distance, taking only the number of  
231 same/different alleles in the core genes into consideration. A Neighbor-Joining (NJ) tree using

232 the appropriate genetic distances was built after the cgMLST analysis. The discriminatory index  
233 was calculated with the Ridom software using the Simpson's discriminatory index as described  
234 (42); cgMLST uses alleles number of each loci for determining the genetic distance and build  
235 the phylogenetic tree. The use of allele numbers reduces the influence of recombination in the  
236 dataset studied and allow for fast clustering determination of genomes

237

238 **Nucleotide sequence accession numbers.** The draft genome sequences of 196 *E. coli* strains  
239 used in our study are available in GenBank under the accession numbers listed in Table S1.

240

## 241 RESULTS

242

### 243 Presence of STEC in FDA regulated foods

244

245 Among 331 suspected STEC strains isolated from FRFDA between 2003 – 2017 and  
246 sequenced by several labs and deposited at NCBI, only 276 were confirmed to be STECs by *in*  
247 *silico* analysis for the presence of either *stx1* or *stx2* (Table S1). Of the 196 identified and  
248 sequenced by our lab, 92% carried either *stx1* or 2 (181/196). From the 74 strains which  
249 genomes were retrieved from NCBI and were initially isolated and sequenced by FDA ORA,  
250 94% carried either *stx1* or 2 (70/74). Of the 63 *E. coli* strains isolated and sequenced by a FDA  
251 contracting laboratory, 43% carried either *stx1* or 2 (25/61). The frequency of isolation of STECs  
252 from foods are listed in Table 1. STECs were isolated from 22 food commodities. Most of these  
253 STECs were isolated from spinach (32%), flour (21%), lettuce (13%), and cilantro (12%).

254

255 The frequency of STEC isolation per year, their sequence type, food commodity and state of  
256 isolation (if available) is listed in Table 2. A median of 30 STECs were recovered from FDA  
257 regulated foods per year. We used 2010 as our starting year, since the number of strains before  
258 that year were sporadically found and came from our STEC historical collection. The STEC  
259 strains analyzed were isolated in 22 states.

260

### 261 Characterization of STEC strains by *in silico* MLST

262

263 Among the 276 STECs analyzed in this study we identified 95 different sequence types (STs)  
264 (35%) by *in silico* MLST. Strains belonging to a ST were isolated between 1 to 12 times in the  
265 period studied (2010-2017) (Table 3 and Table S2). The majority of the STs identified were  
266 observed only one time (45%).

267

## 268 **Characterization of STEC strains by serotyping, and virulence gene profiles**

269

270 However, belonging to a known ST that caused HC is not enough to predict the probability of  
271 the strain to cause disease illness. Therefore, we further characterized these STECs by in silico  
272 virulence determination as well as their predicted serotype (Table 4). The detailed in silico  
273 analysis for presence of virulence genes and serotype is listed in Supplementary Table 2. Table  
274 4 lists only the serotype and some of the most known virulence genes for each strain: *stx1* type,  
275 *stx2* type, *eae* type, *ehxA*, *espP*, *etpD*, *toxB*, *katP*, *subA*, *saa*, and *sab*. We identified at least 81  
276 different serotypes among the 276 STECs sequenced (Table 4). Many of the O types were not  
277 present in our O types database and were listed as unknown. Among those some of the most  
278 common clinical STECs serotypes were identified, such as: O157:H7, O26:H11, O113:H21,  
279 O121:H19, O91:H21, O103:H2, and O111:H8.

280

281 Adherence factors *eae* and *subA* genes were found in 67 (24%) and 72 (26%), respectively  
282 (Table 4). Shiga toxin genes were present as follows: *stx1*- 53 (19%) (variants a and c), *stx2*-  
283 184 (67%) (variants a, b, c, d, d/e, e, and g), while *stx1+stx2* – 39 (15%). The other virulence  
284 genes were more sporadically found: *exhA* gene was present in 169 (61%), *espP* was present  
285 in 118 (43%), *katP* in 24 (9%), *etpD* in 4 (2%), and finally *toxB* was present in 10 (4%).

286

## 287 **Presence of antimicrobial resistance genes**

288

289 Thirty-three of the 276 STEC strains (12%) carried antimicrobial resistance genes (Table 5).  
290 Thirty of them carried multiple antibiotic resistance genes while the remainder three carried a  
291 single gene (*tetA*- IEH-NGS-ECO-00231, FDA00011218, and CFSAN051521). Among the

292 antimicrobial classes observed were genes resistant to aminoglycosides, beta-lactamases,  
293 macrolides, phenicols, quinolones, sulphonamides, tetracyclines, and trimethoprim.

294

### 295 **Phylogenetic relationship of the STEC strains by cgMLST analysis**

296

297 The phylogenetic relationships among the 276 STECs from this study determined by cgMLST  
298 analysis is shown in Figure 1. The genome of O157:H7 strain Sakai (NC\_002695.1) was used  
299 as the reference for the cgMLST. This *E. coli* strain has 5,204 genes, of which 3,860 genes  
300 (core genes) were present in the six genomes used as comparison to generate the cgMLST  
301 scheme (NC\_011353.1 – O157:H7 strain EC4115, NC\_002655.2 - O157:H7 strain EDL933,  
302 NC\_013008.1 – O157:H7 strain TW14359, NC\_013941.1 - O55:H7 strain CB9615,  
303 NC\_017656.1 - O55:H7 strain RM12579, and NC\_017906.1 – O157:H7 strain Xuzhou21). While  
304 791 genes were found in some of the compared genomes. The remainder of the genes were  
305 eliminated from the analysis for several reasons (genes were paralogous, or pseudogenes).  
306 Therefore, a total of 4,651 genes were used as templates for the analysis of the STECs from  
307 this study.

308

309 The initial phylogenetic analysis [Neighbor-Joining (NJ) tree] based on gene differences (allele  
310 based) among these 276 STECs (Figure 1) revealed a complex evolutionary history with the  
311 existence of multiple, highly diverse genomic variants of strains isolated from RFFDA. Some of  
312 these genomes formed discrete groups and clustering was consistent with their ST (ex. all  
313 ST655 strains clustered together). A further analysis by a minimum spanning tree allows  
314 visualization of alleles differences between strains with the same ST that was not seen with the  
315 NJ tree (Figure 2).

316

### 317 **eae positive Non-STEC strains virulence gene profiles**

318

319 Among the 55 non-STECs (lacking either *stx* gene by *in silico* analysis) strains isolated from  
320 FDA regulated foods, we found 35 that were positive for the *eae* gene (Table 6). Most of them  
321 were classified as atypical EPEC (aEPEC) *eae*<sup>+</sup> and *bfpA*<sup>-</sup>. Even though two of them (IEH-NGS-  
322 ECO-00094, and IEH-NGS-ECO-00100) carried *bfpA* (*eae*<sup>+</sup> and *bfpA*<sup>+</sup>) they were missing most  
323 of the common genes found in typical EPEC (Table 6, typical EPEC lineage 1 strain E2348/69).  
324 Therefore, we classified them as aEPEC. Virulence genes for ETEC, EIEC, and EAEC were not  
325 detected among the 331 sequenced *E. coli* strains (results not shown).

326

327 **Discussion**

328

329 STECs are the most dangerous among diarrheagenic *E. coli* for public health worldwide  
330 (5,7,23,43-45). Usually the most threatening STEC are those of O157:H7 serotype (46,47).  
331 However, in recent years there has been an increase in the occurrence of many non-O157  
332 serotypes in humans associated with consumption of contaminated food, including produce and  
333 other FDA regulated products (2,48,49). Some studies have characterized STECs presence  
334 and their virulence potential from FDA regulated products (20,23,50). Most of the STEC isolated  
335 from those products have been only initially screened for the presence of some virulence genes  
336 using PCR (23,51). In the present study, we performed an in-depth analysis by whole genome  
337 sequencing of 331 presumptive STEC strains isolated from FDA regulated foods recovered  
338 during a period of 2003-2017 by two surveillance programs (FDA ORA, and MDP USDA) and  
339 other sources. STECs were isolated from 22 food commodities. It is worth mentioning that even  
340 though the sampling occurred in not all states, the food commodities had nationwide (or at least  
341 multistate) distribution.

342

343 The STEC analyzed in this study were isolated from a wide variety of foods (Table 1), with the  
344 majority isolated from spinach (32%), flour (21%), lettuce (13%), and cilantro (12%) samples  
345 during the period 2010-2017. The actual frequency of flour STECs should be assessed at a  
346 lower frequency of 9%; the spike observed in their frequency was due to the outbreak in flour in  
347 2016, where most STECs (37 strains (66%) of total flour STECs) were isolated. A better  
348 reflection of the frequency of STEC isolated per food commodity, specifically produce, can be  
349 found in Feng and Reddy (2013) (23). Nevertheless, the presence of STECs in FRFDA per year  
350 remained relatively low, with a median of 30 isolates per year. As pointed previously, these  
351 variations in frequency of isolation can be due to seasonal variations, geographical variations, or



352 even due to sporadic outbreaks as was observed for O121:H19 STEC strains isolated from flour  
353 in 2016 (23).

354

355 WGS revealed that these STECs were highly variable with the existence of 95 different  
356 sequence types (STs) and belonging to at least 81 different serotypes. Some serotypes could  
357 not be predicted and might be due to that the O type and H type genes were not present in the  
358 database used which includes the most frequent serotypes found in clinical cases. Most STs  
359 were observed only once while some others were observed more frequently. ST655 was  
360 observed up to 38 times among the STECs analyzed and it was because 37 of those STEC  
361 strains were recovered during the flour outbreak in 2016 (20). The majority of the STEC STs  
362 observed in this study [69/95 -73%] had been reported as causing disease in humans,  
363 according to what was found in Enterobase (<http://enterobase.warwick.ac.uk>). Furthermore, of  
364 these potential human pathogenic STECs, strains belonging to 18 of those STs (19%) were  
365 additionally associated with strains causing EHEC-related illnesses (Table 3). Among the known  
366 ST associated with causing HC illnesses or HUS cases we found: ST21 and ST29 (O26:H11),  
367 ST11 (O157:H7), ST33 (O91:H14), ST17 (O103:H2), and ST16 (O111:H-), among others  
368 (44,52-54).

369

370 Some samples have the same ST however they show differences in their virulence profile as  
371 well as their Shiga toxin gene content. For example, there were 5 strains that were ST10 and  
372 from these only 2 were classified as STECs, with one carrying *stx1a* while the other carried  
373 *stx2a*, both were negative for any of the attaching genes (*ea*e, *saa*, and *subA* genes), therefore  
374 considered as low risk of causing infection in a healthy individual. This is an example that a  
375 single characteristic (e.g. ST or serotype) is not enough to make an inference of the potential  
376 pathogenic trait of any STECs (<http://www.fao.org/documents/card/en/c/CA0032EN>). The better  
377 way is to take all the information into consideration (ST, *stx* type, attaching genes, serotype, etc)

378 in order to make a more informed prediction of the pathogenic potential of any STEC in  
379 conjunction with historical available data on clinical cases. For example, a strain of O113:H21  
380 *stx2a* positive and that doesn't possess *eae* but it has *subA*, *saa*, and *sab* genes, and has been  
381 linked to HUS cases (19), therefore, we can foresee that this strain might be harmful to humans.  
382 A similar analysis could be done in the case of any STEC that have all those attributes but that  
383 has not been linked to any human cases. Even though we cannot predict the actual outcome of  
384 an infection with this strain, it still warrants a warning about its presence in foods that are  
385 consumed raw as it is the case of fresh produce.

386

387 We tested for 95 known virulence genes (27) found in the most common *E. coli* pathotypes and  
388 did not find any genes present that would characterize the strains as STEC/EAEC//ETEC/EIEC  
389 hybrids. Among the adherence factors, *eae* and *subA* genes were found in 24% and 26% of the  
390 STEC strains, respectively. Strains that carry *eae* did not carry *subA* or *saa* genes, and  
391 viceversa, as perviously observed for STEC isolated from fresh produce (23). Regarding the  
392 presence of Shiga toxin type, there was great variation with most strains (67%) carrying only *stx*  
393 type 2, 19% carrying only *stx* type 1 while 15% carried both *stx* types. Among the *stx* type 2  
394 there were 144 that were either a,d, or c, which are the *stx2* types found among clinical cases  
395 (31,32,55-57) and that have specific trophism for humans (56). The remaining 40 STECs  
396 carrying *stx* type 2 alone were *stx* type (e, d/e and g) which have been described in animal  
397 reservoirs (58). The ones carrying both *stx* types were all *stx1a*. The remaining virulence genes  
398 were sporadically found with the most common *exhA* gene was found in 61% of the STECs,  
399 while *espP* was found in 43% of the STECs. These two genes can be found in the virulence  
400 plasmid and appears to participate in STECs infection in humans (9,11,13). In summary, 46 of  
401 the STECs analyzed in this study carried both *stx2a* and *eae* gene which is considered of  
402 elevated risk to human health (22,56).

403

404 We also confirmed the presence of antimicrobial resistance (AMR) genes using the DTU  
405 database with our modified protocol (Ridom) and find that their prevalence to be low at only  
406 12%, although carrying multiple antimicrobial resistance genes. The presence of strains carrying  
407 multiple AMR genes is worrisome since they can be shared amongst other *E. coli* and could  
408 possible participate in the dissemination of AMR in their environments, as has been observed  
409 occurring for tetracycline genes in *E. coli* isolates from beef cattle (59), for colistin resistance  
410 (*mcr-1* gene) through plasmid-mediated transfer (60), and for ampicillin resistance genes in *E.*  
411 *coli* in an infant treated with antibiotics (61).

412

413 Phylogenetic analysis by a custom cgMLST analysis of these 276 STECs confirmed the MLST  
414 *in silico* analysis, with many different defined clades among these STECs isolated from FRFDA.  
415 The cgMLST analysis is a fast method of analysis and provides an initial visualization of the  
416 relationships among the strains analyzed. Comparable results have been observed for  
417 establishing fast relationships among genomes from diverse bacterial pathogens (29,43,62-67).  
418 A further analysis using only the genomes of strains that are located within each individual or  
419 among selected clades can produce a more detailed evolutionary history, using single  
420 nucleotide analyses, which can help in determining to understand the potential source,  
421 phylogenetic nature, lineage, and timeline of transmission of each group, as has been shown for  
422 the ST36 lineage of *Vibrio parahaemolyticus* (68).

423

424 EPECs are the leading cause of infantile diarrhea in developing countries (70,71). Typical  
425 EPECs (tEPEC) have *eae* and *bfp* genes, and their main reservoir is humans (72).  
426 The *eae* gene is located in the chromosome, in the LEE operon, while the *bfp* operon is typically  
427 located in the large EPEC adherence factor (EAF) virulence plasmid (72). These tEPEC also  
428 carry the *perA* gene, which increases the expression of LEE elements (72,73). Interestingly,  
429 17% of our presumptive STECs were shown by *in silico* analysis to be atypical EPECs

430 (aEPEC). Among their unusual features are the absence of the EAF plasmid, and their  
431 reservoirs can be animals or humans (72). It is possible these aEPECs might have lost their  
432 phages upon culturing, as this pattern has been observed in clinical isolates of *E. coli* upon sub-  
433 cultivation (69). The aEPEC we observed in this study may have the capacity to produce A/E  
434 lesions, since they carried both the *eae* and *tir* gene, which are the effector and receptor  
435 necessary for the formation of the A/E lesion (74).

436

437 Our results suggest that finding aEPECs in food could be of particular concern, as these strains  
438 have the potential for acquiring the *stx* phage, as observed in the *E. coli* O104:H4 strain found in  
439 Germany (75). That strain was an entero-aggregative *E. coli* (EAEC) that had acquired  
440 an *stx2a* phage, and human illnesses that resulted during 2011 became the largest known HUS  
441 outbreak of STEC-related illness in the world (75). Similarly, an O26:H11 strain 21765, isolated  
442 in 2005 during a milk cheese outbreak in France (76) was shown to be an EPEC strain that had  
443 probably acquired a *stx2a* phage (27). In Gonzalez-Escalona et al (2016), the authors  
444 demonstrated that some strains of *E. coli* O26:H11 isolated from US cattle were  
445 phylogenetically more closely related to ST29 O26:H11 EHECs but because these did not  
446 carry the *stx* phage, they would have been classified as EHEC-like by previous methods (77).  
447 Over the last five years, the analyses of thousands of *E. coli* genomes have revealed that so-  
448 called *E. coli* “hybrid strains” – strains that belong to one pathotype but acquire virulence  
449 markers, such as *stx* genes, from another pathotype – could be more common than previously  
450 believed. If this is the case, this suggests that environmental *E. coli* strains currently considered  
451 harmless could acquire the potential to pose risks to human health; for example, both aEPEC  
452 and STEC strains were isolated from foods such as flour, cilantro, lettuce, and kale (Table S1).

453

454 We are heading to a new phase in surveillance of STECs in the US by using a genomic  
455 monitoring approach and our STEC sequences from FRFDA provides a solid foundation to build

456 upon (78)( <https://www.cdc.gov/pulsenet/pathogens/wgs.html>). There already exists a database  
457 that achieve the first goal of source tracking by using core genome information (NCBI pathogen  
458 detection tool), but there is a need for improved databases that allow for fast analysis of the  
459 WGS data for detecting virulence genes, phages and plasmids content, as well as antimicrobial  
460 resistance genes.

461

462 In conclusion, STECs were isolated from diverse FRFDA food sources during the period study.  
463 The contamination frequency was relatively low (average 30 STEC strains isolated per year).  
464 However, fifty percent of the STECs analyzed in this study carried either a combination of *eae*  
465 plus *stx*, or *subA* plus *stx*, therefore being potentially pathogenic to humans. Moreover, those  
466 STECs carried most of the virulence genes described for STECs causing infections with a  
467 diverse range from HC (e.g. ST655 O111:H19 strains) to HUS (e.g. ST21 O26:H11 strains)  
468 (20,44). Some others have not been described as causing disease in humans but have the  
469 potential to do so (e.g. ST342 O5:H-unknown strains) since they carried all virulence genes  
470 described in pathogenic strains (*stx1a*, *eae*-beta1, *exhA*, *tir*, and many of the T3SS effectors  
471 and non-LEE effectors) (Table 4). Nonetheless, the determination of the presence of STECs in  
472 FRFDA with potential to cause disease in humans reinforce the need to continue surveillance  
473 for this important pathogen which is of importance for food safety and public health.

474 Furthermore, the availability of these genomes could provide early warnings of food  
475 contamination from cattle or other animals, since some of the STEC isolated were carrying  
476 *stx2e* that have been usually observed causing edema in pigs (79) and are considered as  
477 probably non-pathogenic to humans (56). Here we showed that WGS enabled comparisons  
478 across isolates to establish phylogeny, help in identification of antibiotic resistance by  
479 monitoring the presence of antimicrobial resistance genes, and determined the presence of  
480 known virulence genes that have been linked with illnesses. A freely accessible database of  
481 high-quality reference genome sequences of FRFDA was previously unavailable. Future food

482 safety investigations will benefit from the comparisons made possible by WGS databases like  
483 ours as it allows for the monitoring of the recurrence and emergence of strains in the food  
484 supply. It is our goal to help develop databases that will allow for fast source tracking and  
485 accurate categorization (low risk or high risk) of STECs food isolates in a more comprehensive  
486 manner.  
487

488     **ACKNOWLEDGMENTS**

489     This work was supported by the FDA Foods Science and Research Intramural Program. We  
490     also want to thank Sabina Lindley for assistance in sequencing some of these *E. coli* strains.  
491     The authors thank Lili Fox Vélez for her helpful comments on this manuscript.

492 **FIGURES**

493

494 **Figure 1.** Phylogenetic relationships among the 276 STEC genomes of *E. coli* sequenced in this  
495 study by cgMLST analysis. Ridom SeqSphere+ (v5.0.0) identified 4,651 core genes. The  
496 evolutionary history was inferred by using the Neighbor-joining (NJ) tree built using the genetic  
497 distance and showing the existence of many diverse clades with a complex evolutionary history.  
498 Strains are colored based on different STs as labeled.

499

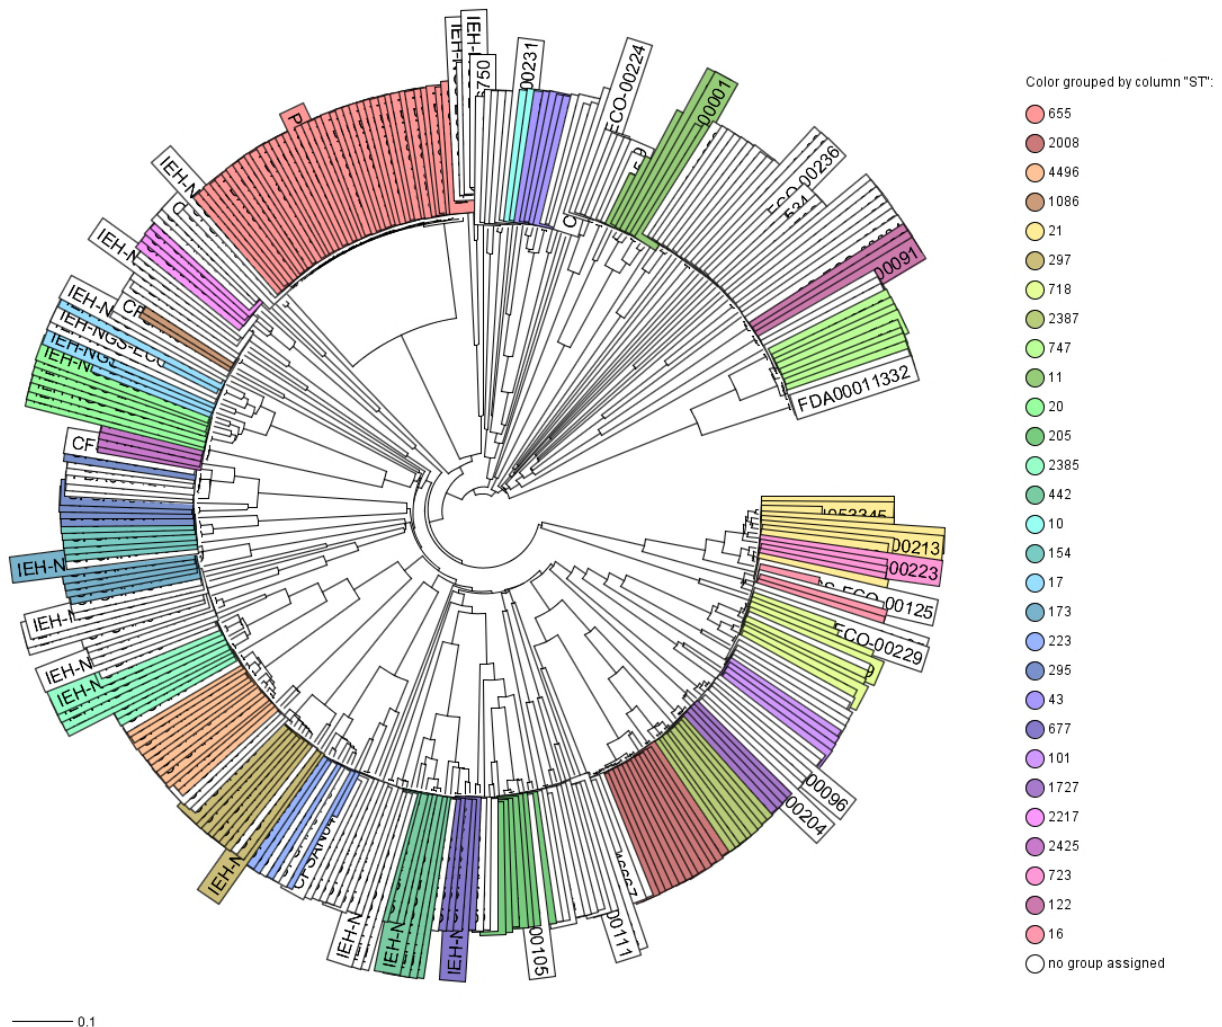



500 **Figure 2.** Snapshot of a minimum spanning tree showing the relationships among all different  
501 STECs. The numbers above the connected lines (not to scale) represent allele differences  
502 between strains belonging to the same ST. The isolates are colored based on different STs as  
503 labeled.

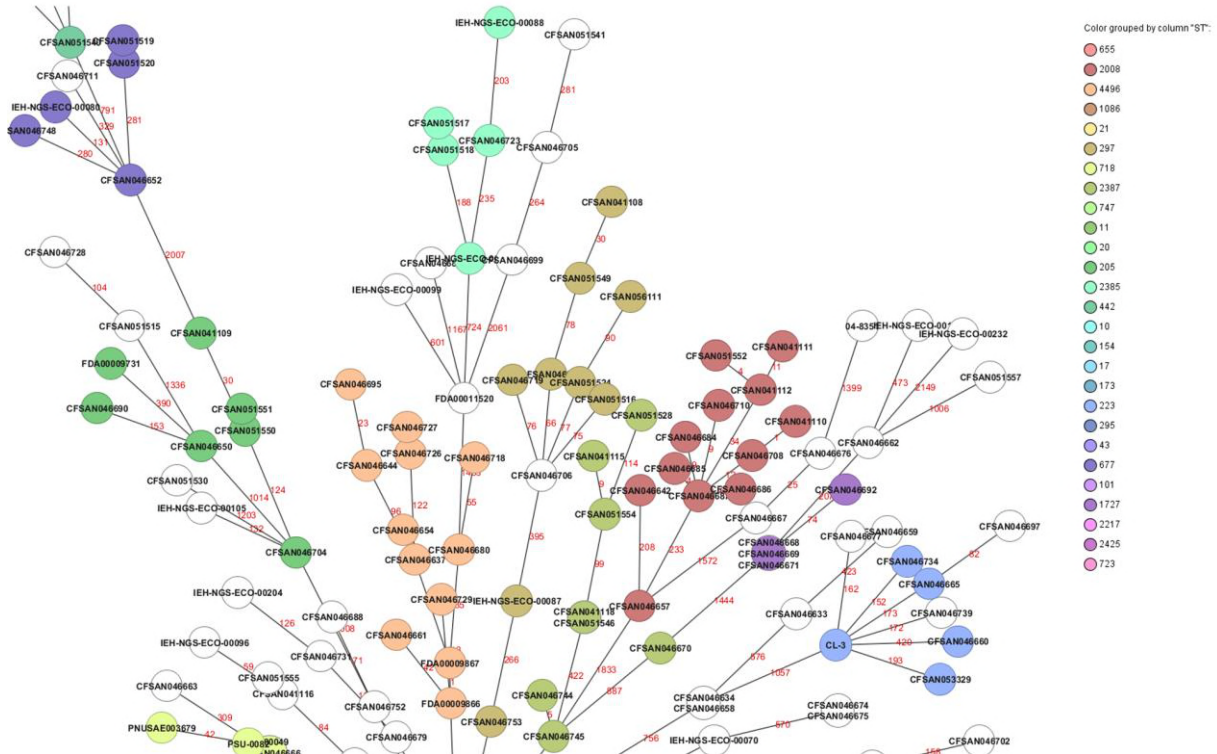

504

505

506

507

508

509

510 **References**

511

- 512 1. **Rangel, J. M., P. H. Sparling, C. Crowe, P. M. Griffin, and D. L. Swerdlow.**  
513 2005. Epidemiology of *Escherichia coli* O157:H7 outbreaks, United States, 1982-  
514 2002. *Emerg. Infect Dis.* **11**:603-609.
- 515 2. **Brooks, J. T., E. G. Sowers, J. G. Wells, K. D. Greene, P. M. Griffin, R. M.**  
516 **Hoekstra, and N. A. Strockbine.** 2005. Non-O157 Shiga toxin-producing  
517 *Escherichia coli* infections in the United States, 1983-2002. *J. Infect Dis.*  
518 **192**:1422-1429.
- 519 3. **Scallan, E., R. M. Hoekstra, F. J. Angulo, R. V. Tauxe, M. A. Widdowson, S.**  
520 **L. Roy, J. L. Jones, and P. M. Griffin.** 2011. Foodborne illness acquired in the  
521 United States--major pathogens. *Emerg. Infect. Dis.* **17**:7-15.
- 522 4. **Beutin, L., G. Krause, S. Zimmermann, S. Kaulfuss, and K. Gleier.** 2004.  
523 Characterization of Shiga toxin-producing *Escherichia coli* strains isolated from  
524 human patients in Germany over a 3-year period. *J Clin Microbiol* **42**:1099-1108.
- 525 5. **Kuehne, A., M. Bouwknecht, A. Havelaar, A. Gilsdorf, P. Hoyer, K. Stark, and**  
526 **D. Werber.** 2016. Estimating true incidence of O157 and non-O157 Shiga toxin-  
527 producing *Escherichia coli* illness in Germany based on notification data of  
528 haemolytic uraemic syndrome. *Epidemiol. Infect.* **144**:3305-3315.
- 529 6. **Byrne, L., C. Jenkins, N. Launders, R. Elson, and G. K. Adak.** 2015. The  
530 epidemiology, microbiology and clinical impact of Shiga toxin-producing  
531 *Escherichia coli* in England, 2009-2012. *Epidemiol. Infect.* **143**:3475-3487.

- 532 7. **McAllister, L. J., S. J. Bent, N. K. Petty, E. Skippington, S. A. Beatson, J. C.**  
533 **Paton, and A. W. Paton.** 2016. Genomic Comparison of Two O111:H-  
534 Enterohemorrhagic *Escherichia coli* Isolates from a Historic Hemolytic-Uremic  
535 Syndrome Outbreak in Australia. *Infect. Immun.* **84**:775-781.
- 536 8. **U.S.Department of Agriculture, F. S. a. I. S.** 2012. Shiga Toxin-Producing  
537 *Escherichia coli* in Certain Raw Beef Products. *Fed. Regist.* **77**:31975-31981.
- 538 9. **Kaper JB, Nataro JP, and Mobley HL.** 2004. Pathogenic *Escherichia coli*. *Nat*  
539 *Rev Microbiol* **2**:123-140.
- 540 10. **Karmali, M. A., M. Mascarenhas, S. Shen, K. Ziebell, S. Johnson, R. Reid-**  
541 **Smith, J. Isaac-Renton, C. Clark, K. Rahn, and J. B. Kaper.** 2003. Association  
542 of genomic O island 122 of *Escherichia coli* EDL 933 with verocytotoxin-  
543 producing *Escherichia coli* seropathotypes that are linked to epidemic and/or  
544 serious disease. *J. Clin. Microbiol.* **41**:4930-4940.
- 545 11. **Nataro JP and Kaper JB.** 1998. Diarrheagenic *Escherichia coli*. *Clin Microbiol*  
546 *Rev* **11**:142-201.
- 547 12. **Garmendia, J., G. Frankel, and V. F. Crepin.** 2005. Enteropathogenic and  
548 enterohemorrhagic *Escherichia coli* infections: translocation, translocation,  
549 translocation. *Infect. Immun.* **73**:2573-2585.
- 550 13. **Garmendia, J., Z. Ren, S. Tennant, M. A. Midolli Viera, Y. Chong, A. Whale,**  
551 **K. Azzopardi, S. Dahan, M. P. Sircili, M. R. Franzolin, L. R. Trabulsi, A.**  
552 **Phillips, T. A. Gomes, J. Xu, R. Robins-Browne, and G. Frankel.** 2005.  
553 Distribution of *tccP* in clinical enterohemorrhagic and enteropathogenic  
554 *Escherichia coli* isolates. *J Clin Microbiol.* **43**:5715-5720.

- 555      14. **Beutin, L., J. Prada, S. Zimmermann, R. Stephan, I. Orskov, and F. Orskov.**  
556            1988. Enterohemolysin, a new type of hemolysin produced by some strains of  
557            enteropathogenic *E. coli* (EPEC). *Zentralbl. Bakteriolog. Mikrobiol. Hyg. A* **267**:576-  
558            588.
- 559      15. **Schmidt, H., C. Kernbach, and H. Karch.** 1996. Analysis of the EHEC hly  
560            operon and its location in the physical map of the large plasmid of  
561            enterohaemorrhagic *Escherichia coli* O157:h7. *Microbiology* **142 ( Pt 4)**:907-914.
- 562      16. **Boerlin, P., S. A. McEwen, F. Boerlin-Petzold, J. B. Wilson, R. P. Johnson,**  
563            **and C. L. Gyles.** 1999. Associations between virulence factors of Shiga toxin-  
564            producing *Escherichia coli* and disease in humans. *J Clin Microbiol.* **37**:497-503.
- 565      17. **Schmidt, H., L. Beutin, and H. Karch.** 1995. Molecular analysis of the plasmid-  
566            encoded hemolysin of *Escherichia coli* O157:H7 strain EDL 933. *Infect. Immun.*  
567            **63**:1055-1061.
- 568      18. **Khaitan, A., D. M. Jandhyala, C. M. Thorpe, J. M. Ritchie, and A. W. Paton.**  
569            2007. The operon encoding SubAB, a novel cytotoxin, is present in shiga toxin-  
570            producing *Escherichia coli* isolates from the United States. *J Clin Microbiol.*  
571            **45**:1374-1375.
- 572      19. **Paton, A. W., P. Srimanote, M. C. Woodrow, and J. C. Paton.** 2001.  
573            Characterization of Saa, a novel autoagglutinating adhesin produced by locus of  
574            enterocyte effacement-negative Shiga-toxigenic *Escherichia coli* strains that are  
575            virulent for humans. *Infect. Immun.* **69**:6999-7009.
- 576      20. **Crowe, S. J., L. Bottichio, L. N. Shade, B. M. Whitney, N. Corral, B. Melius,**  
577            **K. D. Arends, D. Donovan, J. Stone, K. Allen, J. Rosner, J. Beal, L. Whitlock,**

- 578           **A. Blackstock, J. Wetherington, L. A. Newberry, M. N. Schroeder, D.**  
579           **Wagner, E. Trees, S. Viazis, M. E. Wise, and K. P. Neil.** 2017. Shiga Toxin-  
580           Producing *E. coli* Infections Associated with Flour. *N Engl J Med* **377**:2036-2043.
- 581   21. **Erickson, M. C. and M. P. Doyle.** 2007. Food as a vehicle for transmission of  
582           Shiga toxin-producing *Escherichia coli*. *J Food Prot.* **70**:2426-2449.
- 583   22. **Feng, P. C. and S. P. Reddy.** 2014. Prevalence and diversity of enterotoxigenic  
584           *Escherichia coli* strains in fresh produce. *J Food Prot.* **77**:820-823.
- 585   23. **Feng, P. C. and S. Reddy.** 2013. Prevalences of Shiga toxin subtypes and  
586           selected other virulence factors among Shiga-toxigenic *Escherichia coli* strains  
587           isolated from fresh produce. *Appl. Environ. Microbiol.* **79**:6917-6923.
- 588   24. **Allard, M. W., R. Bell, C. M. Ferreira, N. Gonzalez-Escalona, M. Hoffmann, T.**  
589           **Muruvanda, A. Ottesen, P. Ramachandran, E. Reed, S. Sharma, E. Stevens,**  
590           **R. Timme, J. Zheng, and E. W. Brown.** 2018. Genomics of foodborne  
591           pathogens for microbial food safety. *Curr. Opin. Biotechnol* **49**:224-229.
- 592   25. **Bergholz, T. M., A. I. Moreno Switt, and M. Wiedmann.** 2014. Omics  
593           approaches in food safety: fulfilling the promise? *Trends Microbiol.* **22**:275-281.
- 594   26. **Hoffmann, M., Y. Luo, S. R. Monday, N. Gonzalez-Escalona, A. R. Ottesen,**  
595           **T. Muruvanda, C. Wang, G. Kastanis, C. Keys, D. Janies, I. F. Senturk, U. V.**  
596           **Catalyurek, H. Wang, T. S. Hammack, W. J. Wolfgang, D. Schoonmaker-**  
597           **Bopp, A. Chu, R. Myers, J. Haendiges, P. S. Evans, J. Meng, E. A. Strain, M.**  
598           **W. Allard, and E. W. Brown.** 2016. Tracing Origins of the *Salmonella* Bareilly  
599           Strain Causing a Food-borne Outbreak in the United States. *J. Infect Dis.*  
600           **213**:502-508.

- 601 27. **Gonzalez-Escalona, N., M. Toro, L. V. Rump, G. Cao, T. G. Nagaraja, and J.**  
602 **Meng.** 2016. Virulence Gene Profiles and Clonal Relationships of *Escherichia*  
603 *coli* O26:H11 Isolates from Feedlot Cattle as Determined by Whole-Genome  
604 Sequencing. *Appl. Environ. Microbiol.* **82**:3900-3912.
- 605 28. **Maiden, M. C. and O. B. Harrison.** 2016. The population and functional  
606 genomics of the *Neisseria* revealed with gene-by-gene approaches. *J. Clin.*  
607 *Microbiol.*
- 608 29. **Lorenz, S. C., M. L. Kotewicz, M. Hoffmann, N. Gonzalez-Escalona, M.**  
609 **Fischer, and J. A. Kase.** 2016. Complete Genome Sequences of Four  
610 Enterohemolysin-Positive (ehxA) Enterocyte Effacement-Negative Shiga Toxin-  
611 Producing *Escherichia coli* Strains. *Genome Announc.* **4**.
- 612 30. **Dallman, T. J., L. Byrne, N. Launders, K. Glen, K. A. Grant, and C. Jenkins.**  
613 2015. The utility and public health implications of PCR and whole genome  
614 sequencing for the detection and investigation of an outbreak of Shiga toxin-  
615 producing *Escherichia coli* serogroup O26:H11. *Epidemiol. Infect* **143**:1672-1680.
- 616 31. **Beutin, L. and A. Martin.** 2012. Outbreak of Shiga toxin-producing *Escherichia*  
617 *coli* (STEC) O104:H4 infection in Germany causes a paradigm shift with regard  
618 to human pathogenicity of STEC strains. *J. Food Prot.* **75**:408-418.
- 619 32. **Pennington, H.** 2011. *Escherichia coli* O104, Germany 2011. *Lancet Infect. Dis.*
- 620 33. **Li, Z., A. Perez-Osorio, Y. Wang, K. Eckmann, W. A. Glover, M. W. Allard, E.**  
621 **W. Brown, and Y. Chen.** 2017. Whole genome sequencing analyses of *Listeria*  
622 *monocytogenes* that persisted in a milkshake machine for a year and caused  
623 illnesses in Washington State. *BMC Microbiol.* **17**:134.

- 624 34. **Ogura, Y., T. Ooka, A. Iguchi, H. Toh, M. Asadulghani, K. Oshima, T.**  
625 **Kodama, H. Abe, K. Nakayama, K. Kurokawa, T. Tobe, M. Hattori, and T.**  
626 **Hayashi.** 2009. Comparative genomics reveal the mechanism of the parallel  
627 evolution of O157 and non-O157 enterohemorrhagic *Escherichia coli*. Proc. Natl.  
628 Acad. Sci. U. S A **106**:17939-17944.
- 629 35. **Beutin, L. and A. Martin.** 2012. Outbreak of Shiga toxin-producing *Escherichia*  
630 *coli* (STEC) O104:H4 infection in Germany causes a paradigm shift with regard  
631 to human pathogenicity of STEC strains. J. Food Prot. **75**:408-418.
- 632 36. **Rasko, D. A., D. R. Webster, J. W. Sahl, A. Bashir, N. Boisen, F. Scheutz, E.**  
633 **E. Paxinos, R. Sebra, C. S. Chin, D. Iliopoulos, A. Klammer, P. Peluso, L.**  
634 **Lee, A. O. Kislyuk, J. Bullard, A. Kasarskis, S. Wang, J. Eid, D. Rank, J. C.**  
635 **Redman, S. R. Steyert, J. Frimodt-Moller, C. Struve, A. M. Petersen, K. A.**  
636 **Krogfelt, J. P. Nataro, E. E. Schadt, and M. K. Waldor.** 2011. Origins of the *E.*  
637 *coli* strain causing an outbreak of hemolytic-uremic syndrome in Germany. N  
638 Engl J Med **365**:709-717.
- 639 37. **Joensen, K. G., A. M. Tetzschner, A. Iguchi, F. M. Aarestrup, and F. Scheutz.**  
640 2015. Rapid and Easy In Silico Serotyping of *Escherichia coli* Isolates by Use of  
641 Whole-Genome Sequencing Data. J. Clin. Microbiol. **53**:2410-2426.
- 642 38. **Joensen, K. G., F. Scheutz, O. Lund, H. Hasman, R. S. Kaas, E. M. Nielsen,**  
643 **and F. M. Aarestrup.** 2014. Real-time whole-genome sequencing for routine  
644 typing, surveillance, and outbreak detection of verotoxigenic *Escherichia coli*. J.  
645 Clin. Microbiol. **52**:1501-1510.

- 646 39. **Wirth, T., D. Falush, R. Lan, F. Colles, P. Mensa, L. H. Wieler, H. Karch, P. R.**  
647 **Reeves, M. C. Maiden, H. Ochman, and M. Achtman.** 2006. Sex and virulence  
648 in *Escherichia coli*: an evolutionary perspective. *Mol. Microbiol* **60**:1136-1151.
- 649 40. **Zankari, E., H. Hasman, S. Cosentino, M. Vestergaard, S. Rasmussen, O.**  
650 **Lund, F. M. Aarestrup, and M. V. Larsen.** 2012. Identification of acquired  
651 antimicrobial resistance genes. *J. Antimicrob. Chemother.* **67**:2640-2644.
- 652 41. **Nei, M., F. Tajima, and Y. Tateno.** 1983. Accuracy of estimated phylogenetic  
653 trees from molecular data. II. Gene frequency data. *J. Mol. Evol.* **19**:153-170.
- 654 42. **Hunter, P. R. and M. A. Gaston.** 1988. Numerical index of the discriminatory  
655 ability of typing systems: an application of Simpson's index of diversity. *J. Clin.*  
656 *Microbiol.* **26**:2465-2466.
- 657 43. **Gonzalez-Escalona, N., M. Toro, L. V. Rump, G. Cao, T. G. Nagaraja, and J.**  
658 **Meng.** 2016. Virulence Gene Profiles and Clonal Relationships of *Escherichia*  
659 *coli* O26:H11 Isolates from Feedlot Cattle as Determined by Whole-Genome  
660 Sequencing. *Appl. Environ. Microbiol.* **82**:3900-3912.
- 661 44. **Bielaszewska, M., A. Mellmann, S. Bletz, W. Zhang, R. Kock, A. Kossow, R.**  
662 **Prager, A. Fruth, D. Orth-Holler, M. Marejkova, S. Morabito, A. Caprioli, D.**  
663 **Pierard, G. Smith, C. Jenkins, K. Curova, and H. Karch.** 2013.  
664 Enterohemorrhagic *Escherichia coli* O26:H11/H-: a new virulent clone emerges in  
665 Europe. *Clin. Infect Dis.* **56**:1373-1381.
- 666 45. **Taylor, E. V., T. A. Nguyen, K. D. Machesky, E. Koch, M. J. Sotir, S. R.**  
667 **Bohm, J. P. Folster, R. Bokanyi, A. Kupper, S. A. Bidol, A. Emanuel, K. D.**  
668 **Arends, S. A. Johnson, J. Dunn, S. Stroika, M. K. Patel, and I. Williams.**



- 669           2013. Multistate outbreak of *Escherichia coli* O145 infections associated with  
670           romaine lettuce consumption, 2010. J. Food Prot. **76**:939-944.
- 671   46. **Watanabe, H., A. Wada, Y. Inagaki, K. Itoh, and K. Tamura.** 1996. Outbreaks  
672           of enterohaemorrhagic *Escherichia coli* O157:H7 infection by two different  
673           genotype strains in Japan, 1996. Lancet **348**:831-832.
- 674   47. **Bell, B. P., M. Goldoft, P. M. Griffin, M. A. Davis, D. C. Gordon, P. I. Tarr, C.**  
675           **A. Bartleson, J. H. Lewis, T. J. Barrett, J. G. Wells, and .** 1994. A multistate  
676           outbreak of *Escherichia coli* O157:H7-associated bloody diarrhea and hemolytic  
677           uremic syndrome from hamburgers. The Washington experience. JAMA  
678           **272**:1349-1353.
- 679   48. **Ethelberg, S., B. Smith, M. Torpdahl, M. Lisby, J. Boel, T. Jensen, E. M.**  
680           **Nielsen, and K. Molbak.** 2009. Outbreak of non-O157 Shiga toxin-producing  
681           *Escherichia coli* infection from consumption of beef sausage. Clin. Infect Dis.  
682           **48**:e78-e81.
- 683   49. **Fey, P. D., R. S. Wickert, M. E. Rupp, T. J. Safranek, and S. H. Hinrichs.**  
684           2000. Prevalence of non-O157:H7 shiga toxin-producing *Escherichia coli* in  
685           diarrheal stool samples from Nebraska. Emerg. Infect. Dis. **6**:530-533.
- 686   50. **Cooper, K. K., R. E. Mandrell, J. W. Louie, J. Korlach, T. A. Clark, C. T.**  
687           **Parker, S. Huynh, P. S. Chain, S. Ahmed, and M. Q. Carter.** 2014.  
688           Comparative genomics of enterohemorrhagic *Escherichia coli* O145:H28  
689           demonstrates a common evolutionary lineage with *Escherichia coli* O157:H7.  
690           BMC. Genomics **15**:17.

- 691 51. **Feng, P. C., S. Delannoy, D. W. Lacher, L. F. Dos Santos, L. Beutin, P. Fach,**  
692 **M. Rivas, E. L. Hartland, A. W. Paton, and B. E. Guth.** 2014. Genetic diversity  
693 and virulence potential of shiga toxin-producing *Escherichia coli* O113:H21  
694 strains isolated from clinical, environmental, and food sources. *Appl. Environ.*  
695 *Microbiol.* **80**:4757-4763.
- 696 52. **Mellmann, A., M. Bielaszewska, R. Kock, A. W. Friedrich, A. Fruth, B.**  
697 **Middendorf, D. Harmsen, M. A. Schmidt, and H. Karch.** 2008. Analysis of  
698 collection of hemolytic uremic syndrome-associated enterohemorrhagic  
699 *Escherichia coli*. *Emerg. Infect. Dis.* **14**:1287-1290.
- 700 53. **Bielaszewska, M., R. Prager, R. Kock, A. Mellmann, W. Zhang, H. Tschape,**  
701 **P. I. Tarr, and H. Karch.** 2007. Shiga toxin gene loss and transfer in vitro and in  
702 vivo during enterohemorrhagic *Escherichia coli* O26 infection in humans. *Appl.*  
703 *Environ. Microbiol.* **73**:3144-3150.
- 704 54. **McAllister, L. J., S. J. Bent, N. K. Petty, E. Skippington, S. A. Beatson, J. C.**  
705 **Paton, and A. W. Paton.** 2016. Genomic Comparison of Two O111:H-  
706 Enterohemorrhagic *Escherichia coli* Isolates from a Historic Hemolytic-Uremic  
707 Syndrome Outbreak in Australia. *Infect. Immun.* **84**:775-781.
- 708 55. **Bielaszewska, M., A. W. Friedrich, T. Aldick, R. Schurk-Bulgrin, and H.**  
709 **Karch.** 2006. Shiga toxin activatable by intestinal mucus in *Escherichia coli*  
710 isolated from humans: predictor for a severe clinical outcome. *Clin Infect. Dis.*  
711 **43**:1160-1167.
- 712 56. **Scheutz, F., L. D. Teel, L. Beutin, D. Pierard, G. Buvens, H. Karch, A.**  
713 **Mellmann, A. Caprioli, R. Tozzoli, S. Morabito, N. A. Strockbine, A. R.**

- 714 **Melton-Celsa, M. Sanchez, S. Persson, and A. D. O'Brien.** 2012. Multicenter  
715 evaluation of a sequence-based protocol for subtyping Shiga toxins and  
716 standardizing Stx nomenclature. *J Clin Microbiol.* **50**:2951-2963.
- 717 57. **Beutin, L., J. A. Hammerl, J. Reetz, and E. Strauch.** 2014. Shiga toxin 2A-  
718 encoding bacteriophages in enteroaggregative *Escherichia coli* O104:H4 strains.  
719 *Emerg. Infect Dis.* **20**:1567-1568.
- 720 58. **Melton-Celsa, A. R. and A. D. O'Brien.** 1998. Structure, biology, and relative  
721 toxicity of Shiga toxin family members for cells and animals, p. 121-128. *In:* J. B.  
722 Kaper and A. D. O'Brien (eds.), *Escherichia coli* O157:H7 and other Shiga toxin-  
723 producing *E. coli* strains. ASM Press, Washington, DC.
- 724 59. **Shin, S. W., M. K. Shin, M. Jung, K. M. Belaynehe, and H. S. Yoo.** 2015.  
725 Prevalence of Antimicrobial Resistance and Transfer of Tetracycline Resistance  
726 Genes in *Escherichia coli* Isolates from Beef Cattle. *Appl. Environ. Microbiol.*  
727 **81**:5560-5566.
- 728 60. **Liu, Y. Y., Y. Wang, T. R. Walsh, L. X. Yi, R. Zhang, J. Spencer, Y. Doi, G.**  
729 **Tian, B. Dong, X. Huang, L. F. Yu, D. Gu, H. Ren, X. Chen, L. Lv, D. He, H.**  
730 **Zhou, Z. Liang, J. H. Liu, and J. Shen.** 2016. Emergence of plasmid-mediated  
731 colistin resistance mechanism MCR-1 in animals and human beings in China: a  
732 microbiological and molecular biological study. *Lancet Infect. Dis.* **16**:161-168.
- 733 61. **Karami, N., A. Martner, V. I. Enne, S. Swerkersson, I. Adlerberth, and A. E.**  
734 **Wold.** 2007. Transfer of an ampicillin resistance gene between two *Escherichia*  
735 *coli* strains in the bowel microbiota of an infant treated with antibiotics. *J*  
736 *Antimicrob Chemother* **60**:1142-1145.

- 737 62. **Ruppitsch, W., A. Pietzka, K. Prior, S. Bletz, H. L. Fernandez, F. Allerberger,**  
738 **D. Harmsen, and A. Mellmann.** 2015. Defining and Evaluating a Core Genome  
739 Multilocus Sequence Typing Scheme for Whole-Genome Sequence-Based  
740 Typing of *Listeria monocytogenes*. *J. Clin. Microbiol.* **53**:2869-2876.
- 741 63. **Chen, Y., N. Gonzalez-Escalona, T. S. Hammack, M. W. Allard, E. A. Strain,**  
742 **and E. W. Brown.** 2016. Core Genome Multilocus Sequence Typing for  
743 Identification of Globally Distributed Clonal Groups and Differentiation of  
744 Outbreak Strains of *Listeria monocytogenes*. *Appl. Environ. Microbiol.* **82**:6258-  
745 6272.
- 746 64. **Gonzalez-Escalona, N., R. G. Gavilan, E. W. Brown, and J. Martinez-Urtaza.**  
747 2015. Transoceanic Spreading of Pathogenic Strains of *Vibrio parahaemolyticus*  
748 with Distinctive Genetic Signatures in the *recA* Gene. *PLoS. One.* **10**:e0117485.
- 749 65. **Strauss, L., M. Stegger, P. E. Akpaka, A. Alabi, S. Breurec, G. Coombs, B.**  
750 **Egyir, A. R. Larsen, F. Laurent, S. Monecke, G. Peters, R. Skov, B.**  
751 **Strommenger, F. Vandenesch, F. Schaumburg, and A. Mellmann.** 2017.  
752 Origin, evolution, and global transmission of community-acquired *Staphylococcus*  
753 *aureus* ST8. *Proc. Natl. Acad. Sci. U. S A* **114**:E10596-E10604.
- 754 66. **Gonzalez-Escalona, N., K. A. Jolley, E. Reed, and J. Martinez-Urtaza.** 2017.  
755 Defining a Core Genome Multilocus Sequence Typing Scheme for the Global  
756 Epidemiology of *Vibrio parahaemolyticus*. *J Clin Microbiol* **55**:1682-1697.
- 757 67. **Ghanem, M., L. Wang, Y. Zhang, S. Edwards, A. Lu, D. Ley, and M. El-**  
758 **Gazzar.** 2018. Core Genome Multilocus Sequence Typing: a Standardized  
759 Approach for Molecular Typing of *Mycoplasma gallisepticum*. *J Clin Microbiol* **56**.

- 760 68. **Martinez-Urtaza, J., A. R. van, M. Abanto, J. Haendiges, R. A. Myers, J.**  
761 **Trinanes, C. Baker-Austin, and N. Gonzalez-Escalona.** 2017. Genomic  
762 Variation and Evolution of *Vibrio parahaemolyticus* ST36 over the Course of a  
763 Transcontinental Epidemic Expansion. *MBio* **8**.
- 764 69. **Karch, H., T. Meyer, H. Russmann, and J. Heesemann.** 1992. Frequent loss of  
765 Shiga-like toxin genes in clinical isolates of *Escherichia coli* upon subcultivation.  
766 *Infect. Immun.* **60**:3464-3467.
- 767 70. **Okello, E., K. Moonens, J. Erume, and G. H. De.** 2015. Enterotoxigenic  
768 *Escherichia coli* strains are highly prevalent in Ugandan piggeries but disease  
769 outbreaks are masked by antibiotic prophylaxis. *Trop. Anim Health Prod.* **47**:117-  
770 122.
- 771 71. **Ochoa, T. J. and C. A. Contreras.** 2011. Enteropathogenic *Escherichia coli*  
772 infection in children. *Curr. Opin. Infect. Dis.* **24**:478-483.
- 773 72. **Trabulsi, L. R., R. Keller, and T. A. T. Gomes.** 2002. Typical and Atypical  
774 Enteropathogenic *Escherichia coli*. *Emerg. Infect. Dis* **8**:508-513.
- 775 73. **Elliott, S. J., V. Sperandio, J. A. Giron, S. Shin, J. L. Mellies, L. Wainwright,**  
776 **S. W. Hutcheson, T. K. McDaniel, and J. B. Kaper.** 2000. The locus of  
777 enterocyte effacement (LEE)-encoded regulator controls expression of both LEE-  
778 and non-LEE-encoded virulence factors in enteropathogenic and  
779 enterohemorrhagic *Escherichia coli*. *Infect Immun.* **68**:6115-6126.
- 780 74. **McWilliams, B. D. and A. G. Torres.** 2014. Enterohemorrhagic *Escherichia coli*  
781 adhesins. *Microbiol Spectrum* **2**:EHEC-0003-2013.

- 782 75. Rohde, H., J. Qin, Y. Cui, D. Li, N. J. Loman, M. Hentschke, W. Chen, F. Pu,  
783 Y. Peng, J. Li, F. Xi, S. Li, Y. Li, Z. Zhang, X. Yang, M. Zhao, P. Wang, Y.  
784 Guan, Z. Cen, X. Zhao, M. Christner, R. Kobbe, S. Loos, J. Oh, L. Yang, A.  
785 Danchin, G. F. Gao, Y. Song, Y. Li, H. Yang, J. Wang, J. Xu, M. J. Pallen, J.  
786 Wang, M. Aepfelbacher, and R. Yang. 2011. Open-source genomic analysis of  
787 Shiga-toxin-producing *E. coli* O104:H4. *N Engl J Med* **365**:718-724.
- 788 76. Galia, W., P. Mariani-Kurkdjian, E. Loukiadis, S. Blanquet-Diot, F. Leriche,  
789 H. Brugere, A. Shima, E. Oswald, B. Cournoyer, and D. Thevenot-Sergentet.  
790 2015. Genome Sequence and Annotation of a Human Infection Isolate of  
791 *Escherichia coli* O26:H11 Involved in a Raw Milk Cheese Outbreak. *Genome*  
792 *Announc.* **3**.
- 793 77. Bugarel, M., L. Beutin, F. Scheutz, E. Loukiadis, and P. Fach. 2011.  
794 Identification of genetic markers for differentiation of Shiga toxin-producing,  
795 enteropathogenic, and avirulent strains of *Escherichia coli* O26. *Appl. Environ.*  
796 *Microbiol.* **77**:2275-2281.
- 797 78. Allard, M. W., E. Strain, D. Melka, K. Bunning, S. M. Musser, E. W. Brown,  
798 and R. Timme. 2016. Practical Value of Food Pathogen Traceability through  
799 Building a Whole-Genome Sequencing Network and Database. *J Clin Microbiol.*  
800 **54**:1975-1983.
- 801 79. Oanh, T. K. N., V. K. Nguyen, H. De Greve, and B. M. Goddeeris. 2012.  
802 Protection of Piglets against Edema Disease by Maternal Immunization with  
803 Stx2e Toxoid. *Infect. Immun.* **80**:469-473.

804  
805

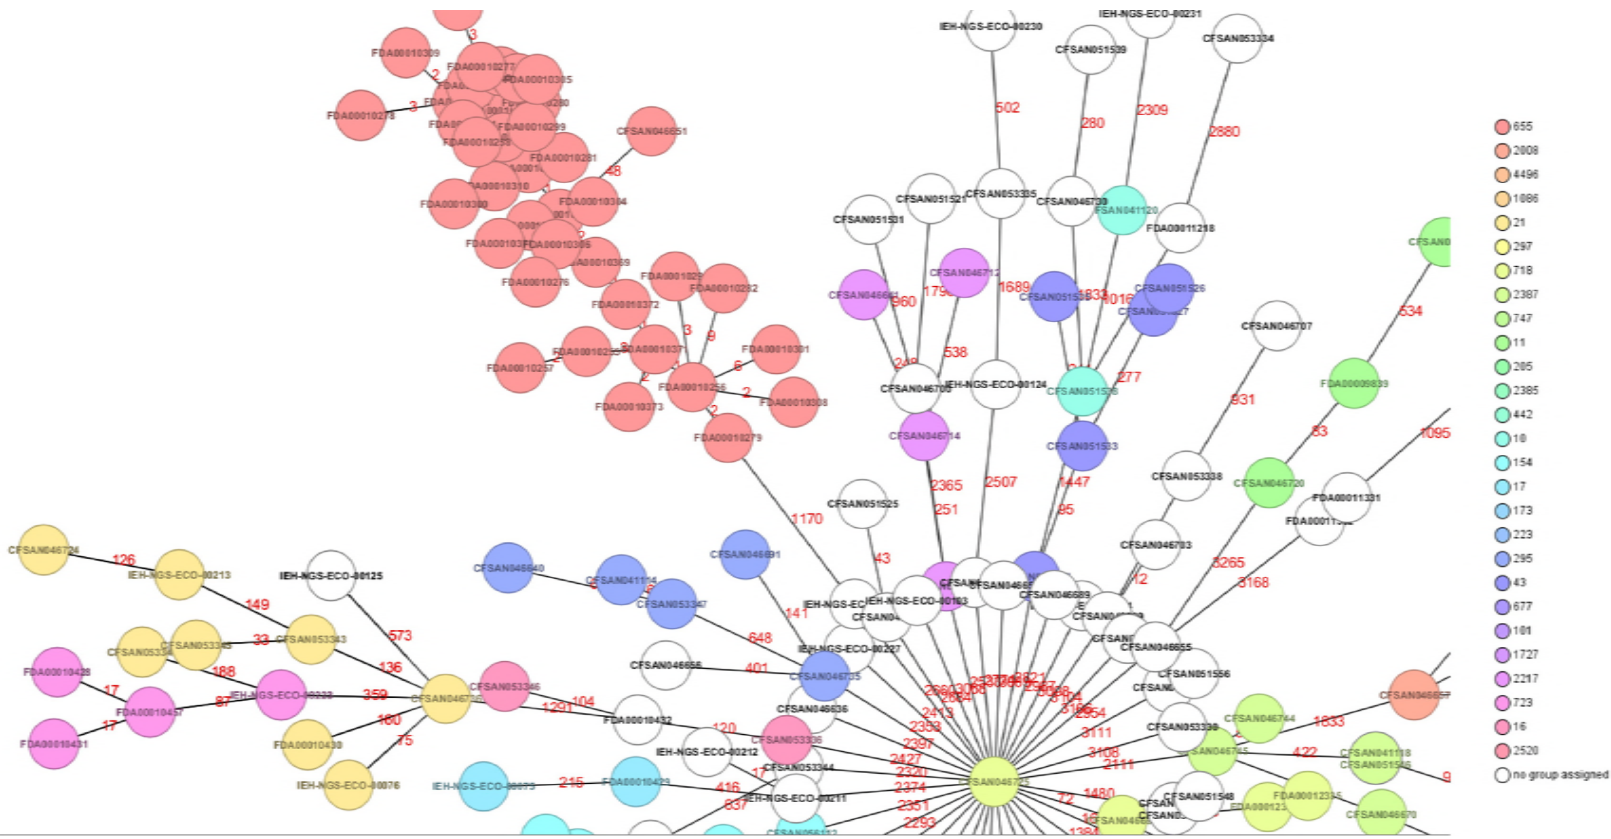

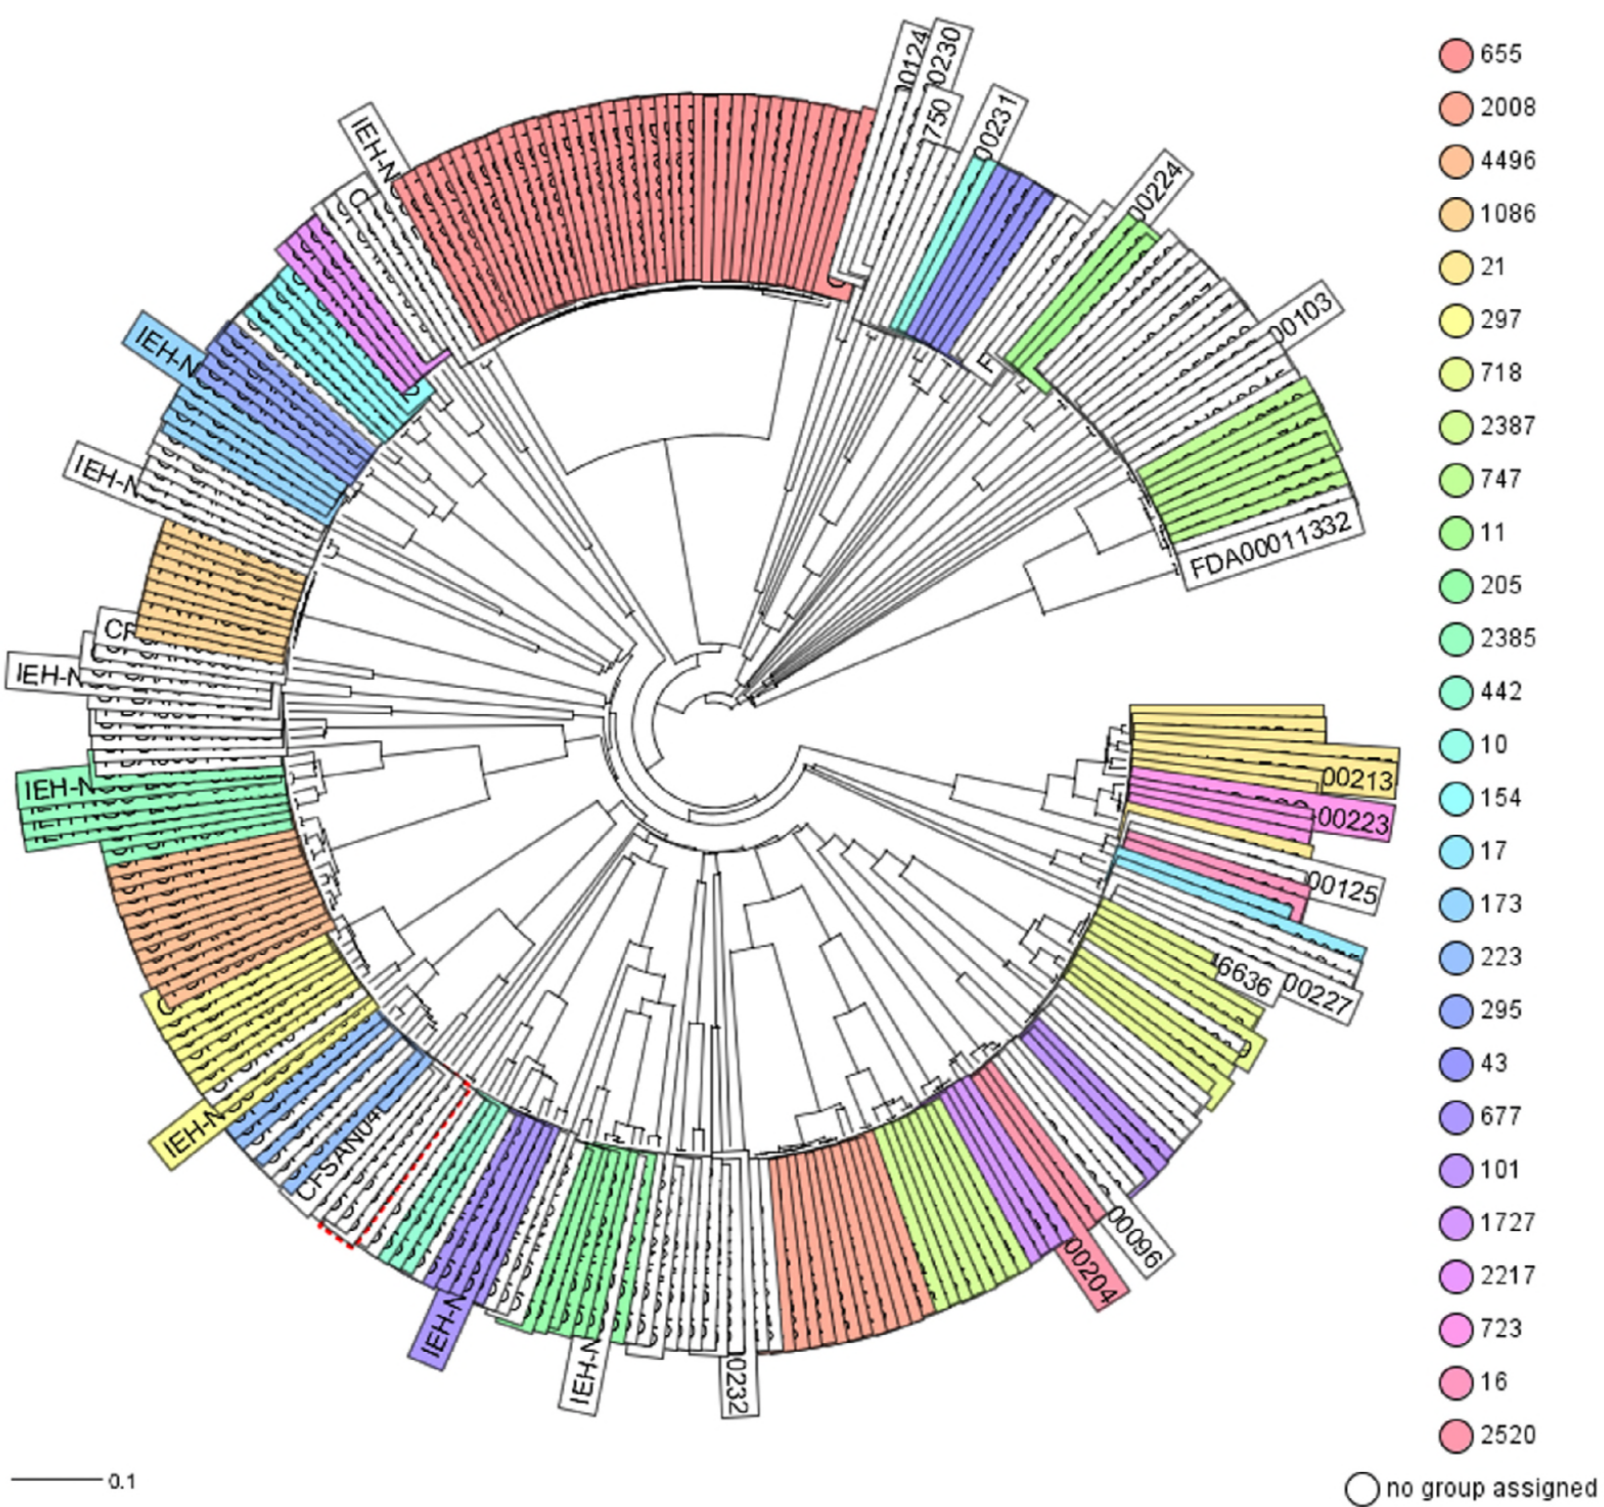



1 **TABLES**

2

3 **Table 1.** Frequency of STEC isolated by food commodity.

4

| <b>Commodities</b>    | <b>No.<br/>strains</b> | <b>%</b>     |
|-----------------------|------------------------|--------------|
| Spinach               | 88                     | 31.88        |
| Flour                 | 59                     | 21.38        |
| Lettuce               | 35                     | 12.68        |
| Cilantro (coriander)  | 32                     | 11.59        |
| Cheese                | 9                      | 3.26         |
| Leafy greens          | 8                      | 2.90         |
| Kale                  | 7                      | 2.54         |
| Basil                 | 6                      | 2.17         |
| Pepper                | 6                      | 2.17         |
| Alfalfa sprouts       | 3                      | 1.09         |
| Cantaloupe            | 3                      | 1.09         |
| Parsley               | 3                      | 1.09         |
| Tomatoes              | 3                      | 1.09         |
| Creamy soy Nut butter | 2                      | 0.72         |
| pizza dough dry mix   | 2                      | 0.72         |
| sprouts               | 2                      | 0.72         |
| Almond                | 1                      | 0.36         |
| oats animal feed      | 1                      | 0.36         |
| Celery                | 1                      | 0.36         |
| Clover sprouts        | 1                      | 0.36         |
| cucumbers             | 1                      | 0.36         |
| animal feed           | 1                      | 0.36         |
| enviromental          | 2                      | 0.72         |
| <b>Total</b>          | <b>276</b>             | <b>16.30</b> |

5

6 The *stx*-negative strains were eliminated from this analysis.

1 **Table 2.** Frequency of STECs isolated from food commodities per year.  
2

| Year <sup>a</sup> | Frequency of Isolation | %             | STs                                                                                                                                   | Commodities                                                                      | State                                              |
|-------------------|------------------------|---------------|---------------------------------------------------------------------------------------------------------------------------------------|----------------------------------------------------------------------------------|----------------------------------------------------|
| 2003              | 3                      | 1.09          | 3017, 641, 446                                                                                                                        | lettuce, celery, tomato                                                          | TX                                                 |
| 2004              | 4                      | 1.45          | 655, 205, 642                                                                                                                         | lettuce, cantaloupe, cilantro                                                    | TX, CA, MD                                         |
| 2005              | 1                      | 0.36          | 677                                                                                                                                   | lettuce                                                                          | CA                                                 |
| 2006              | 4                      | 1.45          | 33,211,764,496                                                                                                                        | Alfalfa sprouts, lettuce                                                         | MI, CA, MN                                         |
| 2007              | 2                      | 0.72          | 297, 295                                                                                                                              | Cantaloupe, lettuce                                                              | NY, OH                                             |
| 2008              | 10                     | 3.62          | 21, 329, 6475, 642, 2217, 4496, 2008, 1385                                                                                            | Spinach, lettuce                                                                 | CA, WA, MI<br>FL, CA, OH,<br>MI, TX, MD,<br>WI, NY |
| 2009              | 11                     | 3.99          | 223, 58, 11, 6509, 718, 4496, 2389, 6638, 2008, 5530                                                                                  | Spinach, lettuce, flour                                                          | TX, CA, FL,<br>WI, NY, CO,<br>WA,                  |
| 2010              | 34                     | 12.32         | 6640, 2520, 154, 661, 443, 205, 718, 173, 2387, 10, 706, 692, 4173, 1431, 4496, 5299, 3, 295, 5435, 2008, 1727                        | Spinach, lettuce, cilantro, sprouts, hot pepper, tomato                          | MI, MN, CA,<br>TX, OH, FL,<br>CO                   |
| 2011              | 38                     | 13.77         | 6642, 942, 297, 6641, 955, 11, 679, 6639, 2161, 21, 692, 2217, 4496, 88, 306, 5435, 205, 2008, 5973, 691, 724                         | Spinach, cantaloupe, lettuce, Almond, Alfalfa sprouts, cilantro, hot pepper      | TX, FL, NC,<br>NY, CO, OH,<br>MI, CA, WA           |
| 2012              | 40                     | 14.49         | 993, 16, 223, 5975, 2520, 443, 1611, 119, 718, 677, 297, 173, 2387, 101, 21, 5602, 747, 906, 5395, 2385, 4496, 101, 442, 295          | Cilantro, Flour, Spinach, Lettuce, Cherry tomatoes                               | GA, CA, TX,<br>TN, AZ                              |
| 2013              | 13                     | 4.71          | 223, 297, 325, 2388, 1611, 394, 677, 156, 937, 2385, 35, 515                                                                          | Cilantro, basil, sprouts, parsley, flour                                         | OH, CA, WI,<br>AZ, WA, KY,<br>OR, PA               |
| 2014              | 36                     | 13.04         | 993, 17, 16, 2520, 297, 329, 442, 679, 677, 297, 173, 657, 2387, 21, 342, 43, 906, 675, 6632, 2385, 88, 3759, 2217, 306, 29, 5960, 10 | Lettuce, kale, cheese, clover sprouts, animal feed, basil, Leafy Greens, spinach | WA, NE, AZ,<br>CA, OR<br>MO, CO, MI,<br>OK, CA     |
| 2015              | 12                     | 4.35          | 723, 1967, 1817, 25, 398, 32, 442, 205, 446, 21, 342, 40                                                                              | Environmental, flour, lettuce, Leafy Greens, spinach, pepper, kale               |                                                    |
| 2016              | 53                     | 19.20         | 655, 747, 723, 4496, 154, 17, 1792, 297, 21, 33                                                                                       | Flour, kale, spinach                                                             |                                                    |
| 2017              | 15                     | 5.43          | 1112, 5082, 662, 1086, 162                                                                                                            | cucumbers, soy nut butter, pepper, flour                                         | KY                                                 |
| <b>Total</b>      | <b>276</b>             | <b>100.00</b> |                                                                                                                                       |                                                                                  |                                                    |

1   <sup>a</sup> - STECs isolated during years 2003-2009 are included as historical STECs and their prevalence was not used for determining the STEC  
2 frequency in foods regulated by the FDA per year.

3

1 **Table 3.** STs observed and number of strains included in each ST. Additionally information is  
 2 provided for strains belonging to those STs such as: link to human cases, link to EHEC cases,  
 3 and known serotypes. These additional reports are based on what it is reported in the *E. coli*  
 4 section of the Enterobase database (<http://enterobase.warwick.ac.uk>).

5  
 6

| ST <sup>a</sup> | No. Strains | %     | Human cases | Reported as EHEC <sup>b</sup> | Known serotypes   |
|-----------------|-------------|-------|-------------|-------------------------------|-------------------|
| 655             | 38          | 13.67 | +           | +                             | O121:H19          |
| 4496            | 12          | 4.32  | +           | NR                            | O8:H28            |
| 2008            | 12          | 4.32  | +           | NR                            | Ounk:H2/40        |
| 21              | 8           | 2.88  | +           | +                             | O26:H11/-         |
| 297             | 9           | 3.24  | +           | - (UPEC, APEC)                | diverse serotypes |
| 205             | 7           | 2.52  | +           | - (UPEC)                      | NR                |
| 43              | 5           | 1.80  | +           | - (ETEC, EAEC)                | O6:H10            |
| 154             | 5           | 1.80  | +           | - (EPEC, APEC)                | diverse serotypes |
| 173             | 5           | 1.80  | +           | NR                            | O181:H49          |
| 295             | 5           | 1.80  | +           | - (EAEC, UPEC, ExPEC)         | diverse serotypes |
| 677             | 5           | 1.80  | +           | +                             | diverse serotypes |
| 747             | 8           | 2.88  | +           | - (ETEC)                      | diverse serotypes |
| 11              | 3           | 1.08  | +           | +                             | O157:H7/-         |
| 16              | 2           | 0.72  | +           | +                             | O111:H8/2/-       |
| 17              | 2           | 0.72  | +           | +                             | O103:H2/-         |
| 25              | 1           | 0.36  | +           | +                             | O128:H2           |
| 29              | 1           | 0.36  | +           | + (also EPEC)                 | O26:H11           |
| 32              | 1           | 0.36  | +           | +                             | O145:H-           |
| 33              | 2           | 0.72  | +           | +                             | O91:H14           |
| 119             | 1           | 0.36  | +           | +                             | O165:H25/28       |
| 223             | 4           | 1.44  | +           | + (also UPEC, EAEC)           | diverse serotypes |
| 306             | 2           | 0.72  | +           | +                             | O84:H2/K+         |
| 329             | 2           | 0.72  | +           | + (also EAEC)                 | diverse serotypes |
| 657             | 1           | 0.36  | +           | +                             | diverse serotypes |
| 675             | 1           | 0.36  | +           | +                             | O76:H19           |
| 679             | 3           | 1.08  | +           | +                             | O163:H19          |
| 724             | 1           | 0.36  | +           | +                             | O154/Ounk:H20     |
| 5299            | 2           | 0.72  | +           | NR                            | O8:H49            |
| 325             | 1           | 0.36  | +           | NR                            | O15:H16/K+        |
| 6639            | 1           | 0.36  | +           | NR                            | O174:H21/36       |
| 661             | 2           | 0.72  | +           | NR                            | O174:H2           |
| 662             | 2           | 0.72  | +           | NR                            | diverse serotypes |
| 691             | 2           | 0.72  | +           | NR                            | diverse serotypes |

|      |   |      |   |                             |                   |
|------|---|------|---|-----------------------------|-------------------|
| 692  | 3 | 1.08 | + | NR                          | O74:H42           |
| 718  | 3 | 1.08 | + | NR                          | O168:H8           |
| 723  | 4 | 1.44 | + | NR                          | O103:H11          |
| 942  | 1 | 0.36 | + | NR                          | O116:H28          |
| 955  | 1 | 0.36 | + | NR                          | O139:H1/6         |
| 993  | 2 | 0.72 | + | NR                          | O100:H30          |
| 1792 | 1 | 0.36 | + | NR                          | O111:H8           |
| 1817 | 1 | 0.36 | + | NR                          | O104:H7           |
| 1967 | 2 | 0.72 | + | NR                          | O103:H2           |
| 2388 | 1 | 0.36 | + | NR                          | O15               |
| 2520 | 3 | 1.08 | + | NR                          | O116:H49          |
| 3759 | 1 | 0.36 | + | NR                          | NR                |
| 5973 | 2 | 0.72 | + | NR                          | Ounk:H2           |
| 6475 | 2 | 0.72 | + | NR                          | O17/077:H45       |
| 10   | 2 | 0.72 | + | - (mainly EAEC, UPEC, ETEC) | diverse serotypes |
| 35   | 1 | 0.36 | + | - (EPEC or UPEC)            | O154:H4,          |
| 40   | 1 | 0.36 | + | - (EAEC)                    | O145:H34/31       |
| 58   | 1 | 0.36 | + | - (EAEC, UPEC, ExPEC, APEC) | O111ac:H21        |
| 88   | 2 | 0.72 | + | - (EAEC, UPEC, ExPEC, APEC) | diverse serotypes |
| 101  | 3 | 1.08 | + | - (EAEC, UPEC, ExPEC, APEC) | diverse serotypes |
| 156  | 1 | 0.36 | + | - (UPEC, ExPEC)             | diverse serotypes |
| 162  | 1 | 0.36 | + | - (UPEC, APEC)              | O8:H19            |
| 342  | 2 | 0.72 | + | - (EPEC)                    | O177:NM           |
| 394  | 1 | 0.36 | + | - (EAEC, UPEC)              | diverse serotypes |
| 398  | 1 | 0.36 | + | - (ExPEC)                   | diverse serotypes |
| 442  | 3 | 1.08 | + | - (EPEC)                    | O146:H21          |
| 443  | 2 | 0.72 | + | - (UPEC)                    | NR                |
| 446  | 2 | 0.72 | + | - (APEC)                    | diverse serotypes |
| 515  | 1 | 0.36 | + | - (EAEC)                    | O2:H9             |
| 641  | 1 | 0.36 | + | - (ExPEC)                   | diverse serotypes |
| 642  | 3 | 1.08 | + | - (EPEC)                    | diverse serotypes |
| 706  | 1 | 0.36 | + | - (UPEC)                    | diverse serotypes |
| 906  | 3 | 1.08 | + | - (UPEC)                    | diverse serotypes |
| 1431 | 1 | 0.36 | + | - (ExPEC)                   | O8:H19/30         |
| 1727 | 4 | 1.44 | + | - (mostly nonpathogen)      | diverse serotypes |
| 937  | 1 | 0.36 | + | - (ExPEC, non pathogen)     | O43:H2            |
| 1385 | 1 | 0.36 | - | - (APEC)                    | Ounk:H4           |
| 1611 | 2 | 0.72 | - | - (APEC)                    | diverse serotypes |
| 5082 | 1 | 0.36 | - | NR                          | NR                |

|      |    |      |   |                 |                   |
|------|----|------|---|-----------------|-------------------|
| 332  | 1  | 0.36 | - | NR              | O171:H2           |
| 5395 | 1  | 0.36 | - | NR              | O74:H8            |
| 5435 | 2  | 0.72 | - | NR              | Ounk:H16          |
| 5530 | 1  | 0.36 | - | NR              | Ounk:H21          |
| 5602 | 2  | 0.72 | - | NR              | 36:H28            |
| 5960 | 1  | 0.36 | - | NR              | NR                |
| 5975 | 1  | 0.36 | - | NR              | O113:H21          |
| 6509 | 1  | 0.36 | - | NR              | O168:H8           |
| 6632 | 1  | 0.36 | - | NR              | O8:H16            |
| 6638 | 1  | 0.36 | - | NR              | Ounk:H19          |
| 3017 | 1  | 0.36 | - | NR              | O116:H21          |
| 6640 | 1  | 0.36 | - | NR              | O113:H21          |
| 6641 | 1  | 0.36 | - | NR              | O130:H11          |
| 6642 | 1  | 0.36 | - | NR              | O113:H21          |
| 1112 | 1  | 0.36 | - | - (nonpathogen) | diverse serotypes |
| 1176 | 1  | 0.36 | - | - (nonpathogen) | O36:H14           |
| 2161 | 1  | 0.36 | - | - (nonpathogen) | O180:H14          |
| 2217 | 4  | 1.44 | - | - (nonpathogen) | diverse serotypes |
| 2389 | 1  | 0.36 | - | - (nonpathogen) | NR                |
| 1086 | 10 | 3.60 | - | - (nonpathogen) | diverse serotypes |
| 2385 | 7  | 2.52 | - | - (nonpathogen) | O8:H19            |
| 2387 | 8  | 2.88 | - | - (nonpathogen) | O185:H7           |
| 4173 | 2  | 0.72 | - | - (nonpathogen) | O79:H2            |

1

2 NR- not reported, UPEC (uropathogenic *E. coli*), EPEC (enteropathogenic *E. coli*), ETEC  
3 (Enterotoxigenic *E. coli*), APEC (Avian pathogenic *E. coli*), EAEC (Enterotoxigenic *E. coli*)  
4 and ExPEC (Extraintestinal pathogenic *E. coli*).

5 <sup>a</sup>-Determined by *in silico* analysis of the WGS assemblies.

6 <sup>b</sup>-when negative, the reported *E. coli* type is stated.

1 **Table 4.** *in silico* characterization of STECs from this study for presence of virulence genes and their serotype.

2

| strains           | ST | serotype  | <i>stx1</i><br>type | <i>stx2</i><br>type | <i>eae</i><br>type | <i>ehxA</i> | <i>espP</i> | <i>etpD</i> | <i>toxB</i> | <i>katP</i> | <i>subA</i> | <i>saa</i> | <i>sab</i> |
|-------------------|----|-----------|---------------------|---------------------|--------------------|-------------|-------------|-------------|-------------|-------------|-------------|------------|------------|
| CFSAN041120       | 10 | O2:H27    | -                   | a                   | -                  | +           | -           | -           | -           | -           | -           | -          | -          |
| CFSAN051538       | 10 | Ounk:H32  | a                   | -                   | -                  | -           | +           | -           | -           | -           | -           | -          | -          |
| CFSAN046715       | 11 | O157:H7   | -                   | a                   | gamma-1            | +           | +           | +           | +           | +           | -           | -          | -          |
| CFSAN046720       | 11 | O157:H7   | -                   | a                   | gamma-1            | +           | +           | +           | +           | +           | -           | -          | -          |
| FDA00009839       | 11 | O157:H7   | -                   | a                   | gamma-1            | +           | +           | +           | -           | +           | -           | -          | -          |
| CFSAN053336       | 16 | O111:H8   | a                   | -                   | theta-2            | +           | -           | -           | -           | -           | -           | -          | -          |
| CFSAN053346       | 16 | O111:H8   | a                   | a                   | theta-2            | +           | -           | -           | -           | -           | -           | -          | -          |
| FDA00010429       | 17 | O103:H2   | a                   | -                   | epsilon            | +           | -           | +           | -           | -           | -           | -          | -          |
| IEH-NGS-ECO-00075 | 17 | O103:H2   | a                   | -                   | epsilon            | +           | +           | -           | +           | -           | -           | -          | -          |
| CFSAN046724       | 21 | O26:H11   | a                   | -                   | beta-1             | +           | +           | -           | -           | +           | -           | -          | -          |
| CFSAN046724       | 21 | O26:H11   | a                   | -                   | beta-1             | +           | -           | -           | -           | +           | -           | -          | -          |
| CFSAN053342       | 21 | O103:H11  | a                   | -                   | beta-1             | +           | +           | -           | +           | +           | -           | -          | -          |
| CFSAN053343       | 21 | O26:H11   | a                   | -                   | beta-1             | +           | +           | -           | +           | +           | -           | -          | -          |
| CFSAN053345       | 21 | O26:H11   | a                   | -                   | beta-1             | +           | +           | -           | +           | +           | -           | -          | -          |
| FDA00010430       | 21 | O26:H11   | a                   | -                   | beta-1             | -           | +           | -           | -           | +           | -           | -          | -          |
| IEH-NGS-ECO-00076 | 21 | O26:H11   | a                   | -                   | beta-1             | +           | +           | -           | +           | +           | -           | -          | -          |
| IEH-NGS-ECO-00213 | 21 | O26:H11   | a                   | -                   | beta-1             | +           | +           | -           | +           | -           | -           | -          | -          |
| IEH-NGS-ECO-00227 | 25 | O128ac:H2 | c                   | -                   | -                  | -           | -           | -           | -           | -           | +           | -          | +          |
| IEH-NGS-ECO-00125 | 29 | Ounk:H11  | -                   | a                   | beta-1             | +           | +           | -           | -           | -           | -           | -          | -          |
| IEH-NGS-ECO-00224 | 32 | O145:H28  | a                   | d                   | gamma-1            | +           | +           | -           | +           | +           | -           | -          | -          |
| CFSAN051773       | 33 | O91:H14   | a                   | d                   | -                  | +           | -           | -           | -           | -           | +           | +          | +          |
| CFSAN053344       | 33 | O91:H14   | a                   | d                   | -                  | +           | -           | -           | -           | -           | +           | -          | +          |

|                   |     |               |   |   |           |   |   |   |   |   |   |   |   |   |
|-------------------|-----|---------------|---|---|-----------|---|---|---|---|---|---|---|---|---|
| IEH-NGS-ECO-00232 | 40  | Ounk:H21      | c | - | -         | - | - | - | - | - | + | - | - | - |
| CFSAN051526       | 43  | O6:H10        | c | - | -         | - | - | - | - | - | + | - | - | - |
| CFSAN051527       | 43  | O6:H10        | c | - | -         | - | - | - | - | - | + | - | - | - |
| CFSAN051533       | 43  | O6:H10        | c | - | -         | - | - | - | - | - | + | - | - | - |
| CFSAN051535       | 43  | O6:H10        | c | - | -         | - | - | - | - | - | - | - | - | - |
| CFSAN051537       | 43  | O6:H10        | c | - | -         | - | - | - | - | - | + | - | - | - |
| CFSAN046659       | 58  | O116:H21      | - | a | -         | + | + | - | - | - | - | + | + | + |
| CFSAN046700       | 88  | O8:H9         | - | e | -         | - | - | - | - | - | - | - | - | - |
| CFSAN051531       | 88  | O8:H30        | - | e | -         | - | - | - | - | - | - | - | - | - |
| CFSAN046737       | 101 | O82:H8        | - | a | -         | + | + | - | - | - | - | - | + | + |
| CFSAN046738       | 101 | O82:H8        | - | a | -         | + | + | - | - | - | - | - | + | + |
| CFSAN046749       | 101 | O21:H21       | - | a | -         | + | - | - | - | - | - | + | + | + |
| CFSAN046750       | 119 | O165:H28      | a | a | epsilon-2 | + | + | - | - | + | - | - | - | - |
| CFSAN046672       | 154 | O88:H25       | a | a | -         | + | - | - | - | - | - | - | + | + |
| CFSAN046673       | 154 | O88:H25       | a | a | -         | + | - | - | - | - | - | - | + | + |
| CFSAN046682       | 154 | O134:H38      | a | d | -         | + | - | - | - | - | - | - | + | + |
| CFSAN056112       | 154 | O88:H25       | a | a | -         | + | - | - | - | - | - | - | + | + |
| CFSAN056113       | 154 | O88:H25       | a | a | -         | + | - | - | - | - | - | - | + | + |
| CFSAN051557       | 156 | O174:H28      | - | d | -         | - | - | - | - | - | - | - | - | - |
| FDA00011520       | 162 | O8:H19        | - | d | -         | - | - | - | - | - | - | - | - | - |
| CFSAN046678       | 173 | O181:H49      | a | a | -         | + | + | - | - | - | - | + | + | + |
| CFSAN046740       | 173 | O181:H49      | - | d | -         | + | + | - | - | - | - | + | + | + |
| CFSAN046747       | 173 | O181:H49      | - | d | -         | + | + | - | - | - | - | + | + | + |
| IEH-NGS-ECO-00108 | 173 | O181:H49      | - | a | -         | + | - | - | - | - | - | + | + | + |
| CFSAN046751       | 173 | O181:H49      | - | d | -         | + | - | - | - | - | - | + | + | + |
| CFSAN041109       | 205 | Ounk:H19      | - | a | -         | + | - | - | - | - | - | + | + | + |
| CFSAN046650       | 205 | O153/O178:H19 | - | a | -         | + | + | - | - | - | - | + | + | + |



|                   |     |               |   |   |      |   |   |   |   |   |   |   |   |
|-------------------|-----|---------------|---|---|------|---|---|---|---|---|---|---|---|
| CFSAN046690       | 205 | O153/O178:H19 | a | a | -    | + | + | - | - | - | + | + | + |
| CFSAN046704       | 205 | Ounk:H19      | - | a | -    | + | + | - | - | - | + | + | + |
| CFSAN051550       | 205 | Ounk:H19      | - | a | -    | + | + | - | - | - | + | + | + |
| CFSAN051551       | 205 | Ounk:H19      | - | a | -    | + | + | - | - | - | + | + | + |
| FDA00009731       | 205 | O153/O178:H19 | a | d | -    | + | - | - | - | - | - | + | + |
| CFSAN046660       | 223 | O113:H21      | - | a | -    | + | + | - | - | - | + | + | + |
| CFSAN046665       | 223 | O113:H21      | - | a | -    | + | + | - | - | - | + | + | + |
| CFSAN053329       | 223 | O113:H21      | - | a | -    | + | + | - | - | - | + | + | + |
| CFSAN046734       | 223 | O113:H21      | - | a | -    | + | + | - | - | - | + | + | + |
| CFSAN041114       | 295 | Ounk:H16      | - | a | -    | + | - | - | - | - | + | + | + |
| CFSAN046640       | 295 | Ounk:H16      | c | b | -    | - | - | - | - | - | - | - | + |
| CFSAN046691       | 295 | Ounk:H11      | - | a | -    | + | + | - | - | - | + | + | + |
| CFSAN053347       | 295 | Ounk:H16      | - | a | -    | + | + | - | - | - | + | + | + |
| CFSAN046735       | 295 | Ounk:H11      | - | a | -    | + | - | - | - | - | + | + | + |
| CFSAN041108       | 297 | O130:H11      | a | d | -    | + | - | - | - | - | + | + | + |
| CFSAN046639       | 297 | O130:H11      | - | a | -    | + | - | - | - | - | + | + | + |
| CFSAN046719       | 297 | O130:H11      | - | d | -    | + | - | - | - | - | + | + | + |
| CFSAN046753       | 297 | O179:H8       | - | a | -    | + | + | - | - | - | + | + | + |
| CFSAN051516       | 297 | O130:H11      | - | a | -    | + | - | - | - | - | + | + | + |
| CFSAN051524       | 297 | O130:H11      | - | a | -    | + | - | - | - | - | + | + | + |
| CFSAN051549       | 297 | O130:H11      | a | d | -    | + | - | - | - | - | + | + | + |
| CFSAN056111       | 297 | O130:H11      | - | a | -    | + | - | - | - | - | + | + | + |
| IEH-NGS-ECO-00087 | 297 | O179:H8       | - | a | -    | + | - | - | - | - | + | + | + |
| CFSAN046717       | 306 | O98:H21       | a | - | zeta | + | + | - | - | - | - | - | - |
| CFSAN051525       | 306 | O98:H21       | a | - | zeta | + | + | - | - | - | - | - | - |
| CFSAN051544       | 325 | O15:H16       | - | g | -    | - | - | - | - | - | - | - | - |
| CFSAN046643       | 329 | O136:H16      | a | - | -    | + | - | - | - | - | - | - | - |



|             |     |          |   |   |           |   |   |   |   |   |   |   |   |
|-------------|-----|----------|---|---|-----------|---|---|---|---|---|---|---|---|
| FDA00010277 | 655 | O121:H19 | - | a | epsilon-2 | + | + | - | - | - | - | - | - |
| FDA00010278 | 655 | O121:H19 | - | a | epsilon-2 | - | - | - | - | - | - | - | - |
| FDA00010279 | 655 | O121:H19 | - | a | epsilon-2 | - | - | - | - | - | - | - | - |
| FDA00010280 | 655 | O121:H19 | - | a | epsilon-2 | + | + | - | - | - | - | - | - |
| FDA00010281 | 655 | O121:H19 | - | a | epsilon-2 | - | - | - | - | - | - | - | - |
| FDA00010282 | 655 | O121:H19 | - | a | epsilon-2 | - | - | - | - | - | - | - | - |
| FDA00010283 | 655 | O121:H19 | - | a | epsilon-2 | + | + | - | - | - | - | - | - |
| FDA00010284 | 655 | O121:H19 | - | a | epsilon-2 | - | - | - | - | - | - | - | - |
| FDA00010285 | 655 | O121:H19 | - | a | epsilon-2 | - | - | - | - | - | - | - | - |
| FDA00010296 | 655 | O121:H19 | - | a | epsilon-2 | + | + | - | - | - | - | - | - |
| FDA00010297 | 655 | O121:H19 | - | a | epsilon-2 | - | - | - | - | - | - | - | - |
| FDA00010298 | 655 | O121:H19 | - | a | epsilon-2 | - | - | - | - | - | - | - | - |
| FDA00010299 | 655 | O121:H19 | - | a | epsilon-2 | + | + | - | - | - | - | - | - |
| FDA00010300 | 655 | O121:H19 | - | a | epsilon-2 | + | + | - | - | - | - | - | - |
| FDA00010301 | 655 | O121:H19 | - | a | epsilon-2 | - | + | - | - | - | - | - | - |
| FDA00010302 | 655 | O121:H19 | - | a | epsilon-2 | - | - | - | - | - | - | - | - |
| FDA00010303 | 655 | O121:H19 | - | a | epsilon-2 | + | + | - | - | - | - | - | - |
| FDA00010304 | 655 | O121:H19 | - | a | epsilon-2 | + | + | - | - | - | - | - | - |
| FDA00010305 | 655 | O121:H19 | - | a | epsilon-2 | - | - | - | - | - | - | - | - |
| FDA00010306 | 655 | O121:H19 | - | a | epsilon-2 | - | - | - | - | - | - | - | - |
| FDA00010307 | 655 | O121:H19 | - | a | epsilon-2 | + | + | - | - | - | - | - | - |
| FDA00010308 | 655 | O121:H19 | - | a | epsilon-2 | - | - | - | - | - | - | - | - |
| FDA00010309 | 655 | O121:H19 | - | a | epsilon-2 | - | - | - | - | - | - | - | - |
| FDA00010310 | 655 | O121:H19 | - | a | epsilon-2 | - | + | - | - | - | - | - | - |
| FDA00010369 | 655 | O121:H19 | - | a | epsilon-2 | + | + | - | - | - | - | - | - |
| FDA00010370 | 655 | O121:H19 | - | a | epsilon-2 | - | + | - | - | - | - | - | - |
| FDA00010371 | 655 | O121:H19 | - | a | epsilon-2 | + | + | - | - | - | - | - | - |

|                   |            |                    |   |   |           |   |   |   |   |   |   |   |   |
|-------------------|------------|--------------------|---|---|-----------|---|---|---|---|---|---|---|---|
| FDA00010372       | 655        | O121:H19           | - | a | epsilon-2 | + | + | - | - | - | - | - | - |
| FDA00010373       | 655        | O121:H19           | - | a | epsilon-2 | - | - | - | - | - | - | - | - |
| IEH-NGS-ECO-00103 | <b>657</b> | O183:H18           | a | d | -         | + | + | - | - | - | + | + | + |
| CFSAN041119       | 661        | O174:H2            | - | c | -         | + | + | - | - | - | - | + | + |
| CFSAN051547       | 661        | O174:H2            | - | c | -         | + | - | - | - | - | - | + | + |
| FDA00011331       | 662        | O73 or O17/O77:H45 | a | d | -         | + | + | - | - | - | - | + | + |
| FDA00011332       | 662        | O73 or O17/O77:H45 | a | d | -         | + | + | - | - | - | - | + | + |
| CFSAN051530       | <b>675</b> | O76:H19            | c | - | -         | + | - | - | - | - | + | - | + |
| CFSAN046652       | 677        | Ounk:H21           | - | d | -         | - | - | - | - | - | - | - | - |
| CFSAN046748       | 677        | O174:H21           | a | d | -         | + | + | - | - | - | + | + | + |
| CFSAN051519       | 677        | O174:H21unk        | - | a | -         | - | - | - | - | - | - | - | + |
| CFSAN051520       | <b>677</b> | O174:H21           | - | a | -         | - | - | - | - | - | - | - | + |
| IEH-NGS-ECO-00080 | 677        | O174?              | - | d | -         | - | - | - | - | - | - | - | - |
| CFSAN046699       | 679        | O163:H19           | - | d | -         | + | + | - | - | - | + | + | + |
| CFSAN046705       | 679        | O163:H19           | - | a | -         | + | + | - | - | - | + | + | + |
| CFSAN051541       | 679        | O163:H19           | a | d | -         | + | + | - | - | - | + | + | + |
| CFSAN053338       | 691        | Ounk:H20           | a | d | -         | + | + | - | - | - | - | + | + |
| CFSAN046703       | 691        | Ounk:H20           | a | - | -         | + | + | - | - | - | - | + | + |
| CFSAN046709       | 691        | Ounk:H20           | a | - | -         | + | + | - | - | - | - | + | + |
| CFSAN041113       | 692        | O74:H42            | a | d | -         | + | + | - | - | - | - | + | + |
| CFSAN051548       | 692        | O74:H42            | a | d | -         | + | + | - | - | - | - | + | + |
| CFSAN051553       | 692        | O74:H42            | a | d | -         | + | + | - | - | - | - | + | + |
| CFSAN046689       | 706        | O32:H1             | - | d | -         | - | - | - | - | - | - | - | + |
| CFSAN046666       | 718        | O168:H8            | - | a | -         | + | - | - | - | - | - | - | - |
| CFSAN046693       | 718        | O168:H8            | - | d | -         | - | - | - | - | - | - | - | - |
| CFSAN046725       | 718        | O168:H8            | - | d | -         | - | - | - | - | - | - | - | - |
| FDA00010428       | 723        | O103:H11           | a | - | beta-1    | - | - | - | - | + | - | - | - |





|                   |      |          |   |     |   |   |   |   |   |   |   |   |   |
|-------------------|------|----------|---|-----|---|---|---|---|---|---|---|---|---|
| CFSAN046710       | 2008 | Ounk:H2  | - | d/c | - | - | - | - | - | - | - | - | - |
| CFSAN051552       | 2008 | Ounk:H2  | - | d/c | - | - | - | - | - | - | - | - | - |
| CFSAN046701       | 2161 | O180:H14 | - | d/e | - | - | - | - | - | - | - | - | - |
| CFSAN046641       | 2217 | O45:H16  | a | -   | - | - | + | - | - | - | - | + | - |
| CFSAN046712       | 2217 | O76:H21  | a | -   | - | - | - | - | - | - | - | + | - |
| CFSAN046714       | 2217 | O8:H16   | a | -   | - | - | + | - | - | - | - | + | - |
| CFSAN051522       | 2217 | O84:H38  | a | -   | - | - | + | - | - | - | - | + | - |
| CFSAN046723       | 2385 | O8:H19   | a | a   | - | + | + | - | - | - | + | + | + |
| CFSAN051517       | 2385 | O8:H19   | a | a   | - | + | + | - | - | - | + | + | + |
| CFSAN051518       | 2385 | O8:H19   | a | a   | - | + | + | - | - | - | + | + | + |
| IEH-NGS-ECO-00082 | 2385 | O8:H19   | a | a   | - | + | + | - | - | - | + | + | + |
| IEH-NGS-ECO-00088 | 2385 | O8:H19   | - | a   | - | + | + | - | - | - | + | + | + |
| IEH-NGS-ECO-00089 | 2385 | O8:H19   | - | a   | - | + | + | - | - | - | + | + | + |
| IEH-NGS-ECO-00090 | 2385 | O8:H19   | a | c   | - | + | + | - | - | - | + | + | + |
| CFSAN041115       | 2387 | O185:H7  | - | c   | - | - | - | - | - | - | - | - | - |
| CFSAN041118       | 2387 | O185:H7  | - | c   | - | - | - | - | - | - | - | - | - |
| CFSAN046670       | 2387 | O185:H7  | - | c   | - | - | - | - | - | - | - | - | - |
| CFSAN051528       | 2387 | O185:H7  | - | c   | - | + | + | - | - | - | - | - | - |
| CFSAN051546       | 2387 | O185:H7  | - | c   | - | + | + | - | - | - | - | - | - |
| CFSAN051554       | 2387 | O185:H7  | - | c   | - | - | - | - | - | - | - | - | - |
| CFSAN046744       | 2387 | O185:H7  | - | c   | - | - | - | - | - | - | + | + | + |
| CFSAN046745       | 2387 | O185:H7  | - | c   | - | - | + | - | - | - | + | + | + |
| CFSAN053339       | 2388 | O15:H27  | - | d   | - | - | - | - | - | - | - | - | - |
| CFSAN046656       | 2389 | Ounk:H11 | - | d   | - | + | + | - | - | - | + | + | + |
| CFSAN046679       | 2520 | O116:H49 | - | a   | - | + | + | - | - | - | + | + | + |
| CFSAN046731       | 2520 | O116:H49 | - | a   | - | + | + | - | - | - | + | + | + |
| IEH-NGS-ECO-00204 | 2520 | O116:H49 | a | a   | - | + | + | - | - | - | + | + | + |

|                   |      |          |   |     |   |   |   |   |   |   |   |   |   |
|-------------------|------|----------|---|-----|---|---|---|---|---|---|---|---|---|
| CFSAN046633       | 3017 | O116:H21 | a | a   | - | + | - | - | - | - | + | + | + |
| IEH-NGS-ECO-00070 | 3759 | O8:H49   | - | a   | - | + | - | - | - | - | + | + | + |
| CFSAN046667       | 4173 | O79:H2   | a | -   | - | - | - | - | - | - | - | - | - |
| CFSAN046676       | 4173 | O79:H2   | a | -   | - | - | - | - | - | - | - | - | - |
| CFSAN046637       | 4496 | O8:H28   | - | d/e | - | + | - | - | - | - | - | - | - |
| CFSAN046644       | 4496 | O8:H28   | - | d/e | - | + | - | - | - | - | - | - | - |
| CFSAN046654       | 4496 | O8:H28   | - | d/e | - | + | - | - | - | - | - | - | - |
| CFSAN046661       | 4496 | O8:H28   | - | d/e | - | + | - | - | - | - | - | - | - |
| CFSAN046680       | 4496 | O8:H28   | - | d/e | - | + | - | - | - | - | - | - | - |
| CFSAN046695       | 4496 | O8:H28   | - | d/e | - | + | - | - | - | - | - | - | - |
| CFSAN046718       | 4496 | O8:H28   | - | d/e | - | + | - | - | - | - | - | - | - |
| CFSAN046726       | 4496 | O8:H28   | - | d/e | - | + | - | - | - | - | - | - | - |
| CFSAN046727       | 4496 | O8:H28   | - | d/e | - | + | - | - | - | - | - | - | - |
| FDA00009866       | 4496 | O8:H28   | - | d/e | - | + | - | - | - | - | - | - | - |
| FDA00009867       | 4496 | O8:H28   | - | d/e | - | - | - | - | - | - | - | - | - |
| CFSAN046729       | 4496 | O8:H28   | - | d/e | - | + | - | - | - | - | - | - | - |
| FDA00011519       | 5082 | O180:H14 | - | d/e | - | - | - | - | - | - | - | - | - |
| CFSAN046674       | 5299 | O8:H49   | a | -   | - | - | - | - | - | - | - | + | + |
| CFSAN046675       | 5299 | O8:H49   | a | -   | - | + | + | - | - | - | - | + | + |
| CFSAN046722       | 5395 | O74:H8   | a | -   | - | + | + | - | - | - | + | + | + |
| CFSAN046694       | 5435 | Ounk:H16 | - | a   | - | + | - | - | - | - | + | + | + |
| CFSAN046696       | 5435 | Ounk:H16 | - | a   | - | + | + | - | - | - | + | + | + |
| CFSAN046664       | 5530 | Ounk:H21 | - | d/e | - | - | - | - | - | - | - | - | - |
| CFSAN041117       | 5602 | O36:H28  | - | g   | - | + | - | - | - | - | - | - | - |
| CFSAN051556       | 5602 | O36:H28  | - | g   | - | + | - | - | - | - | - | - | - |
| IEH-NGS-ECO-00105 | 5960 | Ounk:H19 | - | a   | - | + | + | - | - | - | + | + | + |
| CFSAN046702       | 5973 | Ounk:H2  | - | d   | - | + | + | - | - | - | + | + | + |



|             |      |             |   |     |   |   |   |   |   |   |   |   |   |
|-------------|------|-------------|---|-----|---|---|---|---|---|---|---|---|---|
| CFSAN046716 | 5973 | Ounk:H2     | - | c   | - | + | + | - | - | - | + | + | + |
| CFSAN046739 | 5975 | O113:H21    | - | a   | - | + | + | - | - | - | + | + | + |
| CFSAN046645 | 6475 | O17/O77:H45 | a | a   | - | + | + | - | - | - | - | + | + |
| CFSAN046647 | 6475 | O17/O77:H45 | a | a   | - | + | + | - | - | - | - | - | - |
| CFSAN046663 | 6509 | O168:H8     | - | d/e | - | + | - | - | - | - | - | - | - |
| CFSAN051521 | 6632 | O8:H16      | - | d   | - | - | + | - | - | - | - | + | - |
| CFSAN046662 | 6638 | Ounk:H19    | - | a   | - | + | - | - | - | - | + | + | + |
| CFSAN046711 | 6639 | O174:H21    | - | c   | - | - | + | - | - | - | - | - | - |
| CFSAN046677 | 6640 | O113:H21    | - | d   | - | + | + | - | - | - | + | + | + |
| CFSAN046706 | 6641 | O130:H11    | a | -   | - | + | - | - | - | - | + | + | + |
| CFSAN046697 | 6642 | O113:H21    | - | a   | - | + | + | - | - | - | + | + | + |

---

**Table 5.** Presence of antimicrobial resistance genes identified by *in silico* analysis in the 276 STEC genomes analyzed in this study.

| Strains                        | <i>bla</i>               |                          |                          |                          |                         |                          |                          |                          |                          |                          |                          |                          |                          |                           |
|--------------------------------|--------------------------|--------------------------|--------------------------|--------------------------|-------------------------|--------------------------|--------------------------|--------------------------|--------------------------|--------------------------|--------------------------|--------------------------|--------------------------|---------------------------|
|                                | <i>aadA</i> <sup>a</sup> | <i>aph3</i> <sup>a</sup> | <i>strA</i> <sup>a</sup> | <i>strB</i> <sup>a</sup> | <i>TEM</i> <sup>b</sup> | <i>floR</i> <sup>d</sup> | <i>QnrB</i> <sup>e</sup> | <i>sul1</i> <sup>f</sup> | <i>sul2</i> <sup>f</sup> | <i>sul3</i> <sup>f</sup> | <i>tetA</i> <sup>g</sup> | <i>tetB</i> <sup>g</sup> | <i>tetC</i> <sup>g</sup> | <i>dfrA</i> <sup>ha</sup> |
| CFSAN053338                    | -                        | -                        | +                        | +                        | -                       | -                        | -                        | -                        | -                        | -                        | -                        | -                        | -                        | -                         |
| CFSAN046714 <sup>g</sup>       | -                        | -                        | -                        | -                        | -                       | -                        | -                        | +                        | -                        | +                        | -                        | -                        | +                        | -                         |
| CFSAN051552                    | -                        | -                        | +                        | +                        | -                       | -                        | -                        | -                        | +                        | -                        | -                        | +                        | -                        | -                         |
| CFSAN046710                    | -                        | -                        | +                        | +                        | -                       | -                        | -                        | -                        | +                        | -                        | -                        | +                        | -                        | -                         |
| CFSAN046642                    | -                        | -                        | +                        | +                        | -                       | -                        | -                        | -                        | +                        | -                        | -                        | +                        | -                        | -                         |
| IEH-NGS-ECO-00231              | -                        | -                        | -                        | -                        | -                       | -                        | -                        | -                        | -                        | -                        | +                        | -                        | -                        | -                         |
| CFSAN053336                    | -                        | +                        | +                        | +                        | -                       | -                        | -                        | -                        | +                        | -                        | +                        | -                        | -                        | -                         |
| FDA00009425                    | -                        | -                        | +                        | +                        | -                       | +                        | -                        | -                        | +                        | -                        | +                        | -                        | -                        | -                         |
| FDA00011218                    | -                        | -                        | -                        | -                        | -                       | -                        | -                        | -                        | -                        | -                        | +                        | -                        | -                        | -                         |
| IEH-NGS-ECO-00230 <sup>i</sup> | +                        | -                        | +                        | +                        | -                       | +                        | -                        | +                        | +                        | +                        | -                        | -                        | -                        | -                         |
| CFSAN051526                    | +                        | -                        | -                        | -                        | -                       | -                        | -                        | +                        | -                        | +                        | +                        | -                        | -                        | -                         |
| CFSAN046636                    | -                        | -                        | +                        | +                        | -                       | -                        | -                        | -                        | +                        | -                        | -                        | +                        | -                        | -                         |
| CFSAN046669                    | -                        | -                        | +                        | +                        | -                       | -                        | -                        | -                        | +                        | -                        | -                        | +                        | -                        | -                         |
| CFSAN046668                    | -                        | -                        | +                        | +                        | -                       | -                        | -                        | -                        | +                        | -                        | -                        | +                        | -                        | -                         |
| CFSAN053334                    | -                        | -                        | +                        | +                        | -                       | +                        | -                        | -                        | +                        | -                        | +                        | -                        | -                        | -                         |
| CFSAN046687                    | -                        | -                        | +                        | +                        | -                       | -                        | -                        | -                        | +                        | -                        | -                        | +                        | -                        | -                         |
| CFSAN051521                    | -                        | -                        | -                        | -                        | -                       | -                        | -                        | -                        | -                        | -                        | +                        | -                        | -                        | -                         |
| CFSAN046730                    | -                        | +                        | +                        | +                        | -                       | -                        | -                        | -                        | +                        | -                        | -                        | +                        | -                        | -                         |
| CFSAN041112                    | -                        | -                        | +                        | +                        | -                       | -                        | -                        | -                        | +                        | -                        | -                        | +                        | -                        | -                         |
| CFSAN041111                    | -                        | -                        | +                        | +                        | -                       | -                        | -                        | -                        | +                        | -                        | -                        | +                        | -                        | -                         |
| CFSAN046671                    | -                        | -                        | +                        | +                        | -                       | -                        | -                        | -                        | +                        | -                        | -                        | +                        | -                        | -                         |
| CFSAN046708                    | -                        | -                        | +                        | +                        | -                       | -                        | -                        | -                        | +                        | -                        | -                        | +                        | -                        | -                         |
| CFSAN046685                    | -                        | -                        | +                        | +                        | -                       | -                        | -                        | -                        | +                        | -                        | -                        | +                        | -                        | -                         |
| CFSAN046684                    | -                        | -                        | +                        | +                        | -                       | -                        | -                        | -                        | +                        | -                        | -                        | +                        | -                        | -                         |
| CFSAN051527                    | +                        | -                        | -                        | -                        | -                       | -                        | -                        | +                        | -                        | +                        | +                        | -                        | -                        | -                         |
| CFSAN046686                    | -                        | -                        | +                        | +                        | -                       | -                        | -                        | -                        | +                        | -                        | -                        | +                        | -                        | -                         |

|                          |   |   |   |   |   |   |   |   |   |   |   |   |   |   |
|--------------------------|---|---|---|---|---|---|---|---|---|---|---|---|---|---|
| CFSAN051535              | - | - | + | + | + | - | - | - | + | - | + | - | - | - |
| CFSAN046693              | - | - | + | + | - | - | - | - | + | - | - | - | - | - |
| CFSAN046713              | - | - | - | + | + | - | + | - | + | - | + | - | - | + |
| CFSAN046725              | - | - | - | + | - | - | - | - | + | - | - | - | - | - |
| CFSAN051531              | - | - | - | + | - | - | - | - | + | - | + | - | - | + |
| CFSAN051539 <sup>i</sup> | + | + | - | - | + | - | - | - | - | + | - | + | - | - |
| CFSAN041110              | - | - | + | + | - | - | - | - | + | - | - | + | - | - |

<sup>a</sup>Aminoglycoside, <sup>b</sup>Beta-lactamase, <sup>c</sup>Macrolide, <sup>d</sup>Phenicol, <sup>e</sup>Quinolone, <sup>f</sup>Sulphonamide, <sup>g</sup>Tetracycline, and <sup>h</sup>Trimethoprim.  
<sup>g</sup> strain carrying *blaOXA*<sup>b</sup> gene. <sup>i</sup> strain carrying *blaCMY-2*<sup>b</sup> gene. <sup>i</sup> strain carrying *mef(B)*<sup>c</sup>, *cmI*<sup>d</sup> and *cmIA1*<sup>d</sup> genes.

**Table 6.** ST, serotype and virulence profile of intimin positive non-STEC isolated from FDA regulated foods (2003-2017).

| strains | ST  | Serotype  | eae     |             |             |             |             |             |             |            |             |             |             |             |             |             |             |            |             |            |           |
|---------|-----|-----------|---------|-------------|-------------|-------------|-------------|-------------|-------------|------------|-------------|-------------|-------------|-------------|-------------|-------------|-------------|------------|-------------|------------|-----------|
|         |     |           | type    | <i>astA</i> | <i>bfpA</i> | <i>efa1</i> | <i>espC</i> | <i>espF</i> | <i>espJ</i> | <i>gad</i> | <i>nleA</i> | <i>nleB</i> | <i>nleC</i> | <i>espB</i> | <i>espl</i> | <i>espK</i> | <i>celb</i> | <i>cif</i> | <i>ehxA</i> | <i>iss</i> | <i>lp</i> |
| 205     | 10  | Ounk:H40  | theta-2 | -           | -           | -           | -           | -           | -           | -          | -           | -           | -           | -           | -           | -           | -           | -          | +           | -          | +         |
| 107     | 17  | O103:H2   | beta-1  | -           | -           | -           | -           | -           | +           | -          | +           | -           | +           | +           | -           | +           | -           | +          | -           | -          | -         |
| 101     | 20  | O15:H2    | beta-1  | -           | -           | +           | -           | +           | +           | -          | +           | +           | -           | +           | -           | -           | -           | +          | -           | +          |           |
| 110     | 20  | O15:H2    | beta-1  | -           | -           | +           | -           | +           | +           | +          | +           | -           | -           | +           | -           | -           | -           | +          | -           | +          |           |
| 123     | 20  | Ounk:H2   | beta-1  | -           | -           | -           | -           | +           | +           | -          | +           | +           | -           | +           | -           | -           | -           | +          | -           | +          |           |
| 226     | 20  | O128ac:H2 | beta-1  | +           | -           | -           | -           | -           | -           | -          | +           | +           | -           | +           | -           | -           | -           | +          | -           | +          |           |
| 233     | 20  | O51:H2    | beta-1  | -           | -           | -           | -           | +           | +           | -          | +           | +           | -           | +           | -           | -           | -           | +          | -           | +          |           |
| 208     | 20  | O51:H2    | beta-1  | +           | -           | -           | -           | +           | +           | -          | +           | +           | -           | +           | -           | -           | -           | +          | -           | +          |           |
| 94      | 28  | O167:H6   | beta-2  | -           | +           | -           | -           | -           | -           | +          | +           | +           | -           | -           | -           | -           | -           | +          | -           | -          |           |
| 109     | 28  | Ounk:Hunk | beta-2  | -           | -           | -           | -           | -           | -           | -          | +           | +           | -           | -           | -           | -           | -           | +          | -           | -          |           |
| 100     | 28  | O167:H6   | beta-2  | -           | +           | -           | -           | -           | -           | +          | +           | -           | -           | -           | -           | -           | -           | +          | -           | -          |           |
| 83      | 122 | O63:H6    | alpha-2 | -           | -           | -           | +           | +           | -           | +          | -           | +           | -           | -           | -           | -           | -           | +          | -           | -          |           |
| 86      | 122 | O63:H6    | alpha-2 | -           | -           | -           | +           | +           | -           | -          | -           | +           | -           | -           | -           | -           | -           | +          | -           | -          |           |
| 91      | 122 | O63:H6    | alpha-2 | -           | -           | -           | +           | +           | -           | +          | -           | +           | -           | -           | -           | -           | -           | +          | -           | -          |           |
| 95      | 327 | O156:H8   | theta-2 | -           | -           | -           | -           | -           | +           | -          | -           | -           | -           | -           | -           | -           | -           | +          | -           | +          |           |
| 229     | 327 | O156:H8   | theta-2 | -           | -           | -           | -           | -           | +           | -          | -           | +           | -           | -           | -           | -           | -           | +          | -           | +          |           |
| 93      | 328 | Ounk:H7   | beta-1  | -           | -           | +           | -           | +           | +           | -          | +           | +           | -           | +           | -           | -           | -           | +          | -           | -          |           |
| 98      | 328 | Ounk:H7   | beta-1  | -           | -           | +           | -           | +           | +           | -          | +           | +           | -           | +           | -           | -           | -           | +          | -           | -          |           |
| 209     | 337 | O108:H21  | theta-2 | -           | -           | -           | -           | -           | +           | -          | -           | +           | -           | -           | -           | -           | -           | +          | -           | +          |           |
| 210     | 337 | O108:H21  | theta-2 | -           | -           | -           | -           | -           | +           | -          | -           | +           | -           | -           | -           | -           | -           | +          | -           | +          |           |
| 214     | 337 | O108:H21  | theta-2 | -           | -           | -           | -           | -           | +           | -          | -           | +           | -           | -           | -           | -           | -           | +          | -           | -          |           |
| 124     | 342 | O145:H28  | beta-1  | +           | -           | +           | -           | -           | +           | -          | +           | +           | -           | +           | +           | -           | +           | -          | +           | +          |           |

|                       |      |          |           |   |   |   |   |   |   |   |   |   |   |   |   |   |   |   |   |   |
|-----------------------|------|----------|-----------|---|---|---|---|---|---|---|---|---|---|---|---|---|---|---|---|---|
| 225                   | 442  | Ounk:H21 | theta-2   | - | - | - | - | - | + | + | - | - | - | - | - | - | - | + | - | - |
| 228                   | 442  | Ounk:H21 | theta-2   | + | - | - | - | - | + | + | - | + | - | - | - | - | + | + | - | - |
| 234                   | 442  | Ounk:H21 | theta-2   | - | - | - | - | + | + | - | - | + | - | - | - | - | + | + | - | - |
| 235                   | 442  | O146:H21 | theta-2   | + | - | - | - | - | + | + | - | + | - | - | - | - | - | + | - | - |
| 99                    | 517  | Ounk:H19 | epsilon-2 | - | - | - | - | + | - | - | - | + | - | - | - | - | - | - | - | - |
| 84                    | 582  | O132:H34 | alpha-2   | - | - | - | + | - | - | + | - | + | + | - | - | - | - | - | - | - |
| 85                    | 582  | O132:H34 | alpha-2   | - | - | - | + | + | - | + | - | + | + | - | - | - | - | - | - | - |
| 97                    | 582  | O132:H34 | alpha-2   | - | - | - | + | + | - | - | - | + | + | - | - | - | - | - | - | - |
| 215                   | 800  | O121:H19 | beta-1    | + | - | + | - | + | + | - | + | + | + | + | - | - | - | - | - | + |
| 206                   | 1092 | O179:H31 | zeta-3    | - | - | - | - | - | - | + | + | + | + | - | - | - | - | - | - | - |
| 111                   | 2166 | Ounk:H19 | theta-2   | - | - | - | - | - | - | + | - | + | - | - | - | - | - | - | - | + |
| 222                   | 4268 | Ounk:H45 | delta     | - | - | - | + | + | + | - | - | - | - | - | - | - | - | - | - | - |
| 236                   | 5965 | O107:H45 | delta     | - | - | - | - | + | + | - | - | + | - | - | - | - | - | + | - | - |
| E2348/69 <sup>b</sup> | 15   | O127:H6  | alpha-1   | + | + | + | + | + | + | + | + | + | + | + | - | - | - | - | - | - |

<sup>a</sup>All strains designation start with IEH-NGS-ECO, except the <sup>b</sup>prototypic EPEC strain.

All strains were positive for *espA*, *tir*, *pssA*, and *air* genes. Only E2348/69b was positive for the *perA* gene.
